# Supplementary material for: Accuracy of novel antigen rapid diagnostics for SARS-CoV-2: A living systematic review and meta-analysis
Source: PubMed Central journal article supplement (PMC8389849; doi:10.1371/journal.pmed.1003735), 2021-08-12

### S3 Fig. Forest plots of all Ag-RDTs.

*Caption:* TP = true positive; FP = false positive; FN = false negative; TN = true negative; CI = confidence interval

#### BD Veritor

| Author, Study ID | Sample size | TP  | FN | TN   | FP | Sensitivity [95%CI] | Specificity [95%CI] |
|------------------|-------------|-----|----|------|----|---------------------|---------------------|
| Pekosz, a28.1    | 251         | 27  | 1  | 220  | 3  | 0.96 [0.82, 1.00]   | 0.99 [0.96, 1.00]   |
| Young, a43.1     | 251         | 29  | 9  | 212  | 1  | 0.76 [0.60, 0.89]   | 1.00 [0.97, 1.00]   |
| Caruana, f34.4   | 532         | 47  | 67 | 417  | 1  | 0.41 [0.32, 0.51]   | 1.00 [0.99, 1.00]   |
| Stohr, f45.1     | 1565        | 86  | 90 | 1387 | 2  | 0.49 [0.41, 0.56]   | 1.00 [1.00, 1.00]   |
| Schuit, f64.1    | 2678        | 149 | 84 | 2436 | 9  | 0.64 [0.57, 0.70]   | 1.00 [0.99, 1.00]   |
| Kilic, f71.1     | 1384        | 77  | 39 | 1253 | 15 | 0.66 [0.57, 0.75]   | 0.99 [0.98, 0.99]   |

#### BinaxNOW

| Author, Study ID  | Sample size | TP  | FN | TN   | FP | Sensitivity [95%CI] | Specificity [95%CI] |
|-------------------|-------------|-----|----|------|----|---------------------|---------------------|
| Pilarowski, a29.1 | 878         | 15  | 11 | 852  | 0  | 0.58 [0.37, 0.77]   | 1.00 [1.00, 1.00]   |
| Pollock, f17.1    | 2308        | 226 | 66 | 2004 | 12 | 0.77 [0.72, 0.82]   | 0.99 [0.99, 1.00]   |
| James, f23.1      | 2339        | 86  | 66 | 2184 | 3  | 0.57 [0.48, 0.65]   | 1.00 [1.00, 1.00]   |
| Okoye, f51.1      | 2638        | 24  | 21 | 2593 | 0  | 0.53 [0.38, 0.68]   | 1.00 [1.00, 1.00]   |

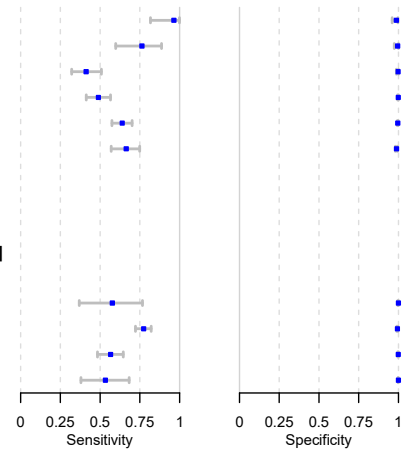

#### Bioeasy

| Author, Study ID     | Sample size | TP | FN | TN  | FP | Sensitivity [95%CI] | Specificity [95%CI] |
|----------------------|-------------|----|----|-----|----|---------------------|---------------------|
| Porte, a31.1         | 127         | 77 | 5  | 45  | 0  | 0.94 [0.86, 0.98]   | 1.00 [0.92, 1.00]   |
| Weitzel, a41.4       | 111         | 68 | 12 | 31  | 0  | 0.85 [0.75, 0.92]   | 1.00 [0.89, 1.00]   |
| Parada-Ricart, a58.1 | 172         | 19 | 7  | 125 | 21 | 0.73 [0.52, 0.88]   | 0.86 [0.79, 0.91]   |

#### Rapigen

| Author, Study ID    | Sample size | TP | FN | TN   | FP | Sensitivity [95%CI] | Specificity [95%CI] |
|---------------------|-------------|----|----|------|----|---------------------|---------------------|
| Schildgen, a33.1    | 73          | 14 | 28 | 27   | 4  | 0.33 [0.20, 0.50]   | 0.87 [0.70, 0.96]   |
| Shrestha, a36.1     | 113         | 40 | 7  | 66   | 0  | 0.85 [0.72, 0.94]   | 1.00 [0.95, 1.00]   |
| Weitzel, a41.1      | 109         | 49 | 30 | 30   | 0  | 0.62 [0.50, 0.73]   | 1.00 [0.88, 1.00]   |
| FINDdx, a62.1       | 476         | 87 | 30 | 355  | 4  | 0.74 [0.66, 0.82]   | 0.99 [0.97, 1.00]   |
| Shidlovskaya, f61.1 | 106         | 44 | 34 | 28   | 0  | 0.56 [0.45, 0.68]   | 1.00 [0.88, 1.00]   |
| FINDdx, a62.2       | 1239        | 13 | 12 | 1214 | 0  | 0.52 [0.31, 0.72]   | 1.00 [1.00, 1.00]   |

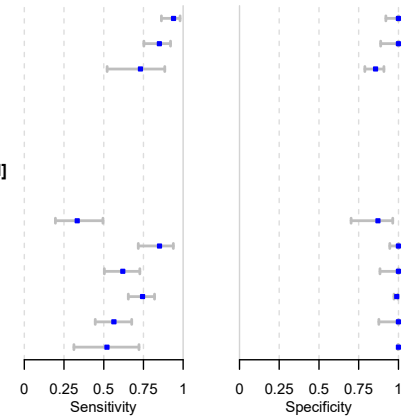

#### Biotical

| Author, Study ID | Sample size | TP | FN | TN | FP | Sensitivity [95%CI] | Specificity [95%CI] |
|------------------|-------------|----|----|----|----|---------------------|---------------------|
| Favresse, f31.1  | 188         | 64 | 32 | 91 | 1  | 0.67 [0.56, 0.76]   | 0.99 [0.94, 1.00]   |

#### Healgen

| Author, Study ID | Sample size | TP | FN | TN | FP | Sensitivity [95%CI] | Specificity [95%CI] |
|------------------|-------------|----|----|----|----|---------------------|---------------------|
| Favresse, f31.3  | 188         | 74 | 22 | 89 | 3  | 0.77 [0.67, 0.85]   | 0.97 [0.91, 0.99]   |

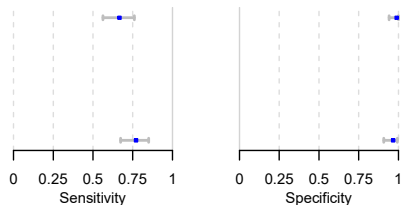

**CareStart**

| Author, Study ID | Sample size | TP  | FN | TN   | FP | Sensitivity [95%CI] | Specificity [95%CI] |
|------------------|-------------|-----|----|------|----|---------------------|---------------------|
| Pollock, f59.1   | 1498        | 135 | 99 | 1243 | 21 | 0.58 [0.51, 0.64]   | 0.98 [0.98, 0.99]   |

**SGTI-flex**

| Author, Study ID    | Sample size | TP | FN | TN | FP | Sensitivity [95%CI] | Specificity [95%CI] |
|---------------------|-------------|----|----|----|----|---------------------|---------------------|
| Shidlovskaya, f61.2 | 106         | 41 | 37 | 27 | 1  | 0.53 [0.41, 0.64]   | 0.96 [0.82, 1.00]   |

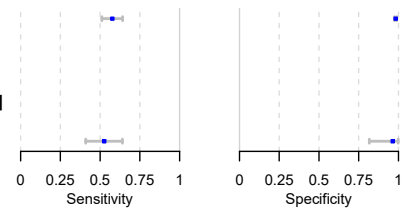

**CLINITEST**

| Author, Study ID | Sample size | TP | FN | TN  | FP | Sensitivity [95%CI] | Specificity [95%CI] |
|------------------|-------------|----|----|-----|----|---------------------|---------------------|
| Olearo, a54.4    | 184         | 46 | 38 | 100 | 0  | 0.55 [0.44, 0.66]   | 1.00 [0.96, 1.00]   |
| Torres, f29.1    | 178         | 73 | 18 | 87  | 0  | 0.80 [0.71, 0.88]   | 1.00 [0.96, 1.00]   |
| Torres, f29.2    | 92          | 15 | 10 | 67  | 0  | 0.60 [0.39, 0.79]   | 1.00 [0.95, 1.00]   |
| Baro, f33.2      | 286         | 52 | 49 | 182 | 3  | 0.52 [0.41, 0.62]   | 0.98 [0.95, 1.00]   |

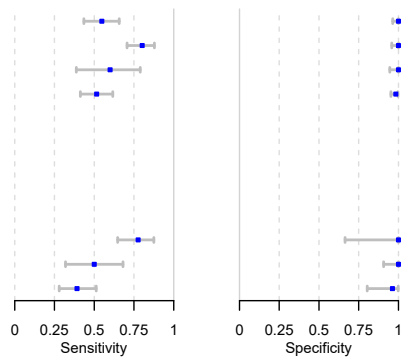

**R-Biopharm**

| Author, Study ID | Sample size | TP | FN | TN | FP | Sensitivity [95%CI] | Specificity [95%CI] |
|------------------|-------------|----|----|----|----|---------------------|---------------------|
| Toptan, a55.1    | 67          | 45 | 13 | 9  | 0  | 0.78 [0.65, 0.88]   | 1.00 [0.66, 1.00]   |
| Toptan, a55.2    | 70          | 16 | 16 | 38 | 0  | 0.50 [0.32, 0.68]   | 1.00 [0.91, 1.00]   |
| Kohmer, f32.1    | 100         | 29 | 45 | 25 | 1  | 0.39 [0.28, 0.51]   | 0.96 [0.80, 1.00]   |

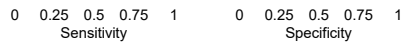

**E25 Bio**

| Author, Study ID | Sample size | TP | FN | TN | FP | Sensitivity [95%CI] | Specificity [95%CI] |
|------------------|-------------|----|----|----|----|---------------------|---------------------|
| Pickering, f73.2 | 200         | 75 | 25 | 86 | 14 | 0.75 [0.65, 0.83]   | 0.86 [0.78, 0.92]   |

**Spring**

| Author, Study ID | Sample size | TP | FN | TN | FP | Sensitivity [95%CI] | Specificity [95%CI] |
|------------------|-------------|----|----|----|----|---------------------|---------------------|
| Pickering, f73.4 | 200         | 77 | 23 | 98 | 2  | 0.77 [0.68, 0.85]   | 0.98 [0.93, 1.00]   |

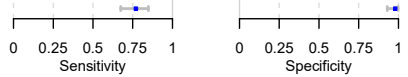

**Ecotest**

| Author, Study ID | Sample size | TP | FN | TN  | FP | Sensitivity [95%CI] | Specificity [95%CI] |
|------------------|-------------|----|----|-----|----|---------------------|---------------------|
| Homza, f87.1     | 318         | 81 | 26 | 204 | 7  | 0.76 [0.66, 0.84]   | 0.97 [0.93, 0.99]   |

**ND COVID**

| Author, Study ID | Sample size | TP | FN | TN | FP | Sensitivity [95%CI] | Specificity [95%CI] |
|------------------|-------------|----|----|----|----|---------------------|---------------------|
| Homza, f87.3     | 191         | 54 | 23 | 64 | 50 | 0.70 [0.59, 0.80]   | 0.56 [0.47, 0.65]   |

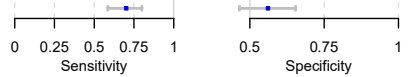

**Elecsys**

| Author, Study ID | Sample size | TP  | FN  | TN   | FP | Sensitivity [95%CI] | Specificity [95%CI] |
|------------------|-------------|-----|-----|------|----|---------------------|---------------------|
| Nörz, f78.1      | 3139        | 236 | 156 | 2743 | 4  | 0.60 [0.55, 0.65]   | 1.00 [1.00, 1.00]   |

**Dräger**

| Author, Study ID | Sample size | TP | FN | TN  | FP | Sensitivity [95%CI] | Specificity [95%CI] |
|------------------|-------------|----|----|-----|----|---------------------|---------------------|
| Osmanodja, f79.1 | 379         | 62 | 8  | 308 | 1  | 0.89 [0.79, 0.95]   | 1.00 [0.98, 1.00]   |

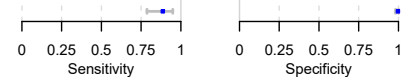

**Encode**

| Author, Study ID | Sample size | TP | FN | TN  | FP | Sensitivity [95%CI] | Specificity [95%CI] |
|------------------|-------------|----|----|-----|----|---------------------|---------------------|
| Pickering, f73.5 | 200         | 74 | 26 | 100 | 0  | 0.74 [0.64, 0.82]   | 1.00 [0.96, 1.00]   |

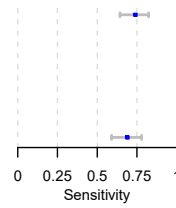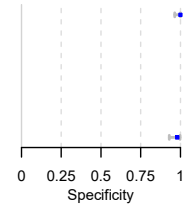

**SureScreen F**

| Author, Study ID | Sample size | TP | FN | TN | FP | Sensitivity [95%CI] | Specificity [95%CI] |
|------------------|-------------|----|----|----|----|---------------------|---------------------|
| Pickering, f73.6 | 200         | 69 | 31 | 98 | 2  | 0.69 [0.59, 0.78]   | 0.98 [0.93, 1.00]   |

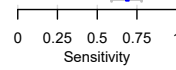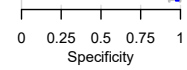

**Espline**

| Author, Study ID | Sample size | TP | FN | TN  | FP | Sensitivity [95%CI] | Specificity [95%CI] |
|------------------|-------------|----|----|-----|----|---------------------|---------------------|
| Takeda, a50.1    | 162         | 50 | 12 | 100 | 0  | 0.81 [0.69, 0.90]   | 1.00 [0.96, 1.00]   |
| Sberna, f83.1    | 136         | 5  | 57 | 74  | 0  | 0.08 [0.03, 0.18]   | 1.00 [0.95, 1.00]   |
| FINDdx, f92.1    | 723         | 88 | 24 | 611 | 0  | 0.79 [0.70, 0.86]   | 1.00 [0.99, 1.00]   |

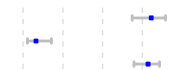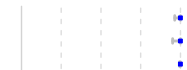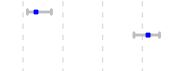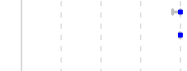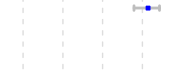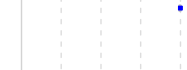

**MEDsan**

| Author, Study ID   | Sample size | TP | FN | TN   | FP | Sensitivity [95%CI] | Specificity [95%CI] |
|--------------------|-------------|----|----|------|----|---------------------|---------------------|
| Olearo, a54.3      | 184         | 38 | 46 | 97   | 3  | 0.45 [0.34, 0.56]   | 0.97 [0.92, 0.99]   |
| Wagenhäuser, f89.3 | 3221        | 23 | 40 | 3146 | 12 | 0.36 [0.25, 0.50]   | 1.00 [0.99, 1.00]   |

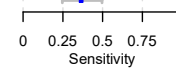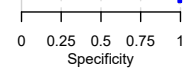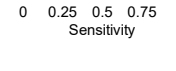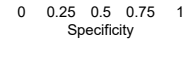

**Exdia**

| Author, Study ID | Sample size | TP | FN | TN  | FP | Sensitivity [95%CI] | Specificity [95%CI] |
|------------------|-------------|----|----|-----|----|---------------------|---------------------|
| Caruana, f34.3   | 532         | 55 | 59 | 416 | 2  | 0.48 [0.39, 0.58]   | 1.00 [0.98, 1.00]   |

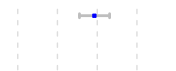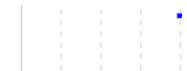

**iChroma**

| Author, Study ID | Sample size | TP | FN | TN  | FP | Sensitivity [95%CI] | Specificity [95%CI] |
|------------------|-------------|----|----|-----|----|---------------------|---------------------|
| FINDdx, f39.1    | 232         | 30 | 11 | 191 | 0  | 0.73 [0.57, 0.86]   | 1.00 [0.98, 1.00]   |

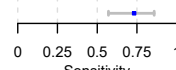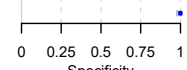

**Joysbio**

| Author, Study ID | Sample size | TP | FN | TN  | FP | Sensitivity [95%CI] | Specificity [95%CI] |
|------------------|-------------|----|----|-----|----|---------------------|---------------------|
| FINDdx, f40.1    | 265         | 31 | 13 | 219 | 2  | 0.70 [0.55, 0.83]   | 0.99 [0.97, 1.00]   |
| Homza, f87.2     | 225         | 52 | 38 | 133 | 2  | 0.58 [0.47, 0.68]   | 0.98 [0.95, 1.00]   |

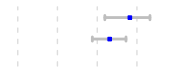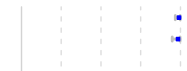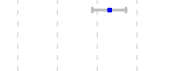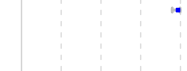

**Wondfo**

| Author, Study ID | Sample size | TP | FN | TN  | FP | Sensitivity [95%CI] | Specificity [95%CI] |
|------------------|-------------|----|----|-----|----|---------------------|---------------------|
| FINDdx, f41.1    | 328         | 48 | 8  | 272 | 0  | 0.86 [0.74, 0.94]   | 1.00 [0.99, 1.00]   |

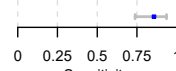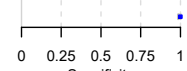

**Lepu**

| Author, Study ID | Sample size | TP | FN | TN  | FP | Sensitivity [95%CI] | Specificity [95%CI] |
|------------------|-------------|----|----|-----|----|---------------------|---------------------|
| Baro, f33.4      | 286         | 46 | 55 | 165 | 20 | 0.46 [0.36, 0.56]   | 0.89 [0.84, 0.93]   |

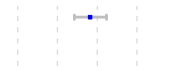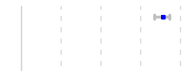

**SureScreen V**

| Author, Study ID | Sample size | TP | FN | TN  | FP | Sensitivity [95%CI] | Specificity [95%CI] |
|------------------|-------------|----|----|-----|----|---------------------|---------------------|
| Baro, f33.5      | 286         | 29 | 72 | 181 | 4  | 0.29 [0.20, 0.39]   | 0.98 [0.95, 0.99]   |
| Pickering, f73.3 | 200         | 65 | 35 | 100 | 0  | 0.65 [0.55, 0.74]   | 1.00 [0.96, 1.00]   |

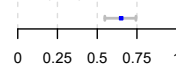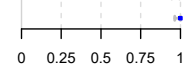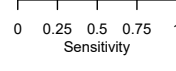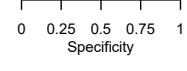

**Nadal**

| Author, Study ID   | Sample size | TP | FN | TN  | FP | Sensitivity [95%CI] | Specificity [95%CI] |
|--------------------|-------------|----|----|-----|----|---------------------|---------------------|
| Kohmer, f32.3      | 100         | 18 | 56 | 26  | 0  | 0.24 [0.15, 0.36]   | 1.00 [0.87, 1.00]   |
| Wagenhäuser, f89.1 | 806         | 13 | 10 | 783 | 0  | 0.56 [0.34, 0.77]   | 1.00 [1.00, 1.00]   |
| FINDDx, f94.1      | 462         | 61 | 8  | 390 | 3  | 0.88 [0.78, 0.95]   | 0.99 [0.98, 1.00]   |

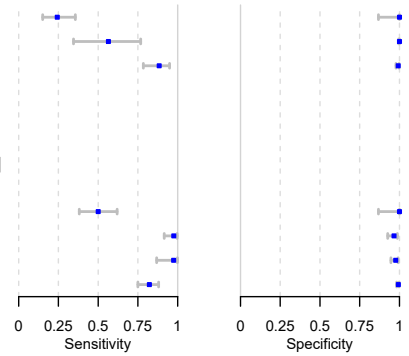

**LumiraDx**

| Author, Study ID | Sample size | TP  | FN | TN  | FP | Sensitivity [95%CI] | Specificity [95%CI] |
|------------------|-------------|-----|----|-----|----|---------------------|---------------------|
| Kohmer, f32.4    | 100         | 37  | 37 | 26  | 0  | 0.50 [0.38, 0.62]   | 1.00 [0.87, 1.00]   |
| Drain, f43.1     | 257         | 81  | 2  | 168 | 6  | 0.98 [0.92, 1.00]   | 0.97 [0.93, 0.99]   |
| Drain, f43.2     | 255         | 39  | 1  | 210 | 5  | 0.98 [0.87, 1.00]   | 0.98 [0.95, 0.99]   |
| Krüger, f58.1    | 761         | 120 | 26 | 611 | 4  | 0.82 [0.75, 0.88]   | 0.99 [0.98, 1.00]   |

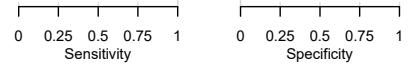

**NowCheck nasal**

| Author, Study ID | Sample size | TP | FN | TN  | FP | Sensitivity [95%CI] | Specificity [95%CI] |
|------------------|-------------|----|----|-----|----|---------------------|---------------------|
| FINDDx, f91.1    | 218         | 71 | 8  | 137 | 2  | 0.90 [0.81, 0.96]   | 0.99 [0.95, 1.00]   |

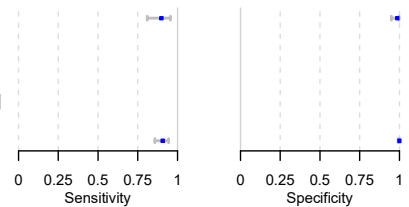

**Mologic**

| Author, Study ID | Sample size | TP  | FN | TN  | FP | Sensitivity [95%CI] | Specificity [95%CI] |
|------------------|-------------|-----|----|-----|----|---------------------|---------------------|
| FINDDx, f93.1    | 665         | 176 | 18 | 471 | 0  | 0.91 [0.86, 0.94]   | 1.00 [0.99, 1.00]   |

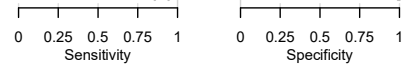

**NowCheck**

| Author, Study ID | Sample size | TP | FN | TN  | FP | Sensitivity [95%CI] | Specificity [95%CI] |
|------------------|-------------|----|----|-----|----|---------------------|---------------------|
| FINDDx, a61.1    | 400         | 91 | 11 | 290 | 8  | 0.89 [0.81, 0.94]   | 0.97 [0.95, 0.99]   |
| FINDDx, f91.2    | 218         | 71 | 8  | 137 | 2  | 0.90 [0.81, 0.96]   | 0.99 [0.95, 1.00]   |

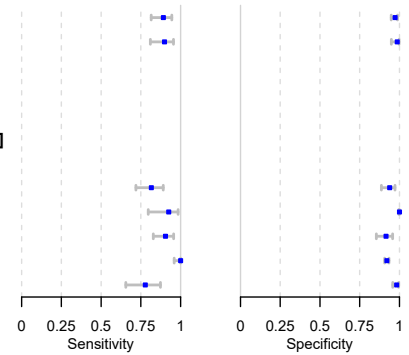

**Lumipulse G**

| Author, Study ID | Sample size | TP | FN | TN   | FP  | Sensitivity [95%CI] | Specificity [95%CI] |
|------------------|-------------|----|----|------|-----|---------------------|---------------------|
| Basso, f10.1     | 234         | 71 | 16 | 138  | 9   | 0.82 [0.72, 0.89]   | 0.94 [0.89, 0.97]   |
| Hirotsu, f47.1   | 1029        | 37 | 3  | 989  | 0   | 0.92 [0.80, 0.98]   | 1.00 [1.00, 1.00]   |
| Gill, f57.1      | 226         | 86 | 9  | 120  | 11  | 0.90 [0.83, 0.96]   | 0.92 [0.86, 0.96]   |
| Gill, f57.2      | 1738        | 90 | 0  | 1518 | 130 | 1.00 [0.96, 1.00]   | 0.92 [0.91, 0.93]   |
| Asai, f74.1      | 305         | 49 | 14 | 238  | 4   | 0.78 [0.66, 0.87]   | 0.98 [0.96, 1.00]   |

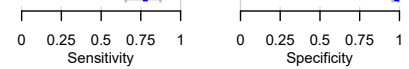

**Panbio (nasal)**

| Author, Study ID | Sample size | TP | FN | TN  | FP | Sensitivity [95%CI] | Specificity [95%CI] |
|------------------|-------------|----|----|-----|----|---------------------|---------------------|
| FINDDx, f42.1    | 281         | 38 | 6  | 235 | 2  | 0.86 [0.73, 0.95]   | 0.99 [0.97, 1.00]   |

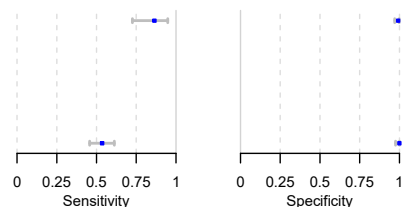

**CerTest**

| Author, Study ID    | Sample size | TP | FN | TN  | FP | Sensitivity [95%CI] | Specificity [95%CI] |
|---------------------|-------------|----|----|-----|----|---------------------|---------------------|
| Pérez-García, f52.1 | 320         | 91 | 79 | 150 | 0  | 0.54 [0.46, 0.61]   | 1.00 [0.98, 1.00]   |

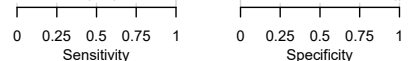

**Panbio**

| Author, Study ID           | Sample size | TP  | FN  | TN   | FP | Sensitivity [95%CI] | Specificity [95%CI] |
|----------------------------|-------------|-----|-----|------|----|---------------------|---------------------|
| Abdulrahman, a01.1         | 4183        | 602 | 131 | 3420 | 30 | 0.82 [0.79, 0.85]   | 0.99 [0.99, 0.99]   |
| Alemaný, a02.1             | 919         | 779 | 55  | 85   | 0  | 0.93 [0.92, 0.95]   | 1.00 [0.96, 1.00]   |
| Alemaný, a02.2             | 487         | 93  | 24  | 365  | 5  | 0.80 [0.71, 0.86]   | 0.99 [0.97, 1.00]   |
| Albert, a03.1              | 412         | 43  | 11  | 358  | 0  | 0.80 [0.66, 0.89]   | 1.00 [0.99, 1.00]   |
| Berger, a05.1              | 535         | 106 | 18  | 411  | 0  | 0.86 [0.78, 0.91]   | 1.00 [0.99, 1.00]   |
| Bulilete, a07.1            | 1362        | 100 | 40  | 1220 | 2  | 0.71 [0.63, 0.79]   | 1.00 [0.99, 1.00]   |
| Drevinek, a10.1            | 591         | 148 | 75  | 368  | 0  | 0.66 [0.60, 0.72]   | 1.00 [0.99, 1.00]   |
| Fenollar, F., a11.1        | 341         | 154 | 50  | 130  | 7  | 0.76 [0.69, 0.81]   | 0.95 [0.90, 0.98]   |
| Gremmels, a12.1            | 1367        | 101 | 38  | 1228 | 0  | 0.73 [0.64, 0.80]   | 1.00 [1.00, 1.00]   |
| Gremmels, a12.2            | 208         | 51  | 12  | 145  | 0  | 0.81 [0.69, 0.90]   | 1.00 [0.98, 1.00]   |
| Linares, a20.1             | 255         | 44  | 16  | 195  | 0  | 0.73 [0.60, 0.84]   | 1.00 [0.98, 1.00]   |
| Merino-Amador, a25.1       | 958         | 325 | 34  | 592  | 7  | 0.90 [0.87, 0.93]   | 0.99 [0.98, 1.00]   |
| Schildgen, a33.2           | 73          | 21  | 21  | 24   | 7  | 0.50 [0.34, 0.66]   | 0.77 [0.59, 0.90]   |
| Schwob, a35.2              | 271         | 105 | 17  | 149  | 0  | 0.86 [0.79, 0.92]   | 1.00 [0.98, 1.00]   |
| Torres, a37.1              | 634         | 38  | 41  | 555  | 0  | 0.48 [0.37, 0.60]   | 1.00 [0.99, 1.00]   |
| Krüger, a52.1              | 1034        | 91  | 13  | 929  | 1  | 0.88 [0.80, 0.93]   | 1.00 [0.99, 1.00]   |
| Oleáro, a54.2              | 184         | 37  | 47  | 100  | 0  | 0.44 [0.33, 0.55]   | 1.00 [0.96, 1.00]   |
| Agullo, a56.1              | 652         | 76  | 56  | 519  | 1  | 0.58 [0.49, 0.66]   | 1.00 [0.99, 1.00]   |
| Agullo, a56.2              | 659         | 59  | 73  | 527  | 0  | 0.45 [0.36, 0.54]   | 1.00 [0.99, 1.00]   |
| Agullo, a56.3              | 610         | 28  | 93  | 489  | 0  | 0.23 [0.16, 0.32]   | 1.00 [0.99, 1.00]   |
| Halfon, f18.1              | 200         | 72  | 28  | 99   | 1  | 0.72 [0.62, 0.80]   | 0.99 [0.95, 1.00]   |
| Ngo Nsoga, f28.1           | 402         | 136 | 32  | 232  | 2  | 0.81 [0.74, 0.87]   | 0.99 [0.97, 1.00]   |
| Akingba, f30.1             | 657         | 101 | 44  | 509  | 3  | 0.70 [0.62, 0.77]   | 0.99 [0.98, 1.00]   |
| Favresse, f31.2            | 188         | 65  | 31  | 92   | 0  | 0.68 [0.57, 0.77]   | 1.00 [0.96, 1.00]   |
| Baro, f33.1                | 286         | 39  | 62  | 184  | 1  | 0.39 [0.29, 0.49]   | 1.00 [0.97, 1.00]   |
| Caruana, f34.2             | 532         | 47  | 67  | 416  | 2  | 0.41 [0.32, 0.51]   | 1.00 [0.98, 1.00]   |
| FINdx, f42.2               | 281         | 40  | 4   | 235  | 2  | 0.91 [0.78, 0.98]   | 0.99 [0.97, 1.00]   |
| Domínguez Fernández, f49.1 | 30          | 19  | 1   | 10   | 0  | 0.95 [0.75, 1.00]   | 1.00 [0.69, 1.00]   |
| Jääskeläinen, f50.3        | 190         | 126 | 26  | 38   | 0  | 0.83 [0.76, 0.88]   | 1.00 [0.91, 1.00]   |
| Pérez-García, f52.2        | 320         | 102 | 68  | 150  | 0  | 0.60 [0.52, 0.67]   | 1.00 [0.98, 1.00]   |
| Villaverde, f55.1          | 1620        | 35  | 42  | 1540 | 3  | 0.46 [0.34, 0.57]   | 1.00 [0.99, 1.00]   |
| Faico-Filho, f63.1         | 127         | 59  | 11  | 56   | 1  | 0.84 [0.74, 0.92]   | 0.98 [0.91, 1.00]   |
| Stokes, f65.1              | 1641        | 231 | 37  | 1371 | 2  | 0.86 [0.81, 0.90]   | 1.00 [1.00, 1.00]   |
| Del Vecchio, f66.1         | 1441        | 42  | 19  | 1379 | 1  | 0.69 [0.56, 0.80]   | 1.00 [1.00, 1.00]   |
| L...Huillier, f72.1        | 822         | 78  | 41  | 702  | 1  | 0.66 [0.56, 0.74]   | 1.00 [0.99, 1.00]   |

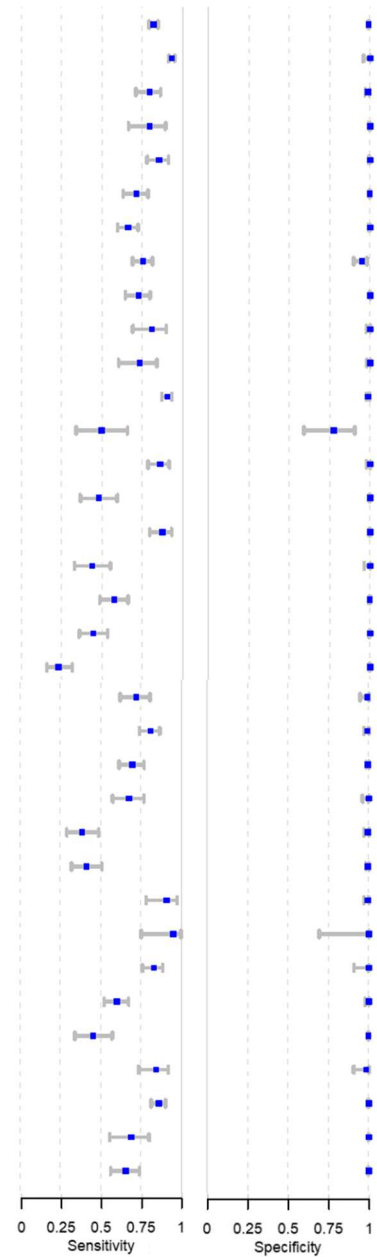

**QuickNavi**

| Author, Study ID | Sample size | TP | FN | TN   | FP | Sensitivity [95%CI] | Specificity [95%CI] |
|------------------|-------------|----|----|------|----|---------------------|---------------------|
| Takeuchi, f12.1  | 1186        | 91 | 14 | 1081 | 0  | 0.87 [0.79, 0.92]   | 1.00 [1.00, 1.00]   |
| Takeuchi, f60.1  | 862         | 37 | 14 | 811  | 0  | 0.72 [0.58, 0.84]   | 1.00 [1.00, 1.00]   |

**ECODiagnostica**

| Author, Study ID | Sample size | TP | FN | TN | FP | Sensitivity [95%CI] | Specificity [95%CI] |
|------------------|-------------|----|----|----|----|---------------------|---------------------|
| Figueiras, f14.1 | 139         | 38 | 17 | 83 | 1  | 0.69 [0.55, 0.81]   | 0.99 [0.94, 1.00]   |

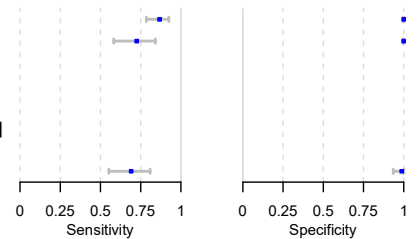

**Roche**

| Author, Study ID | Sample size | TP | FN | TN | FP | Sensitivity [95%CI] | Specificity [95%CI] |
|------------------|-------------|----|----|----|----|---------------------|---------------------|
| Favresse, f31.4  | 188         | 67 | 29 | 92 | 0  | 0.70 [0.60, 0.79]   | 1.00 [0.96, 1.00]   |

**VITROS**

| Author, Study ID | Sample size | TP | FN | TN | FP | Sensitivity [95%CI] | Specificity [95%CI] |
|------------------|-------------|----|----|----|----|---------------------|---------------------|
| Favresse, f31.5  | 188         | 80 | 16 | 92 | 0  | 0.83 [0.74, 0.90]   | 1.00 [0.96, 1.00]   |

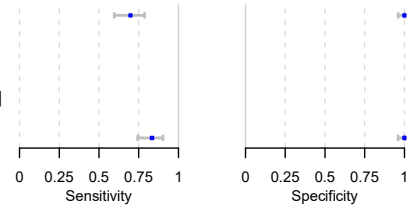

**Sienna**

| Author, Study ID | Sample size | TP | FN | TN | FP | Sensitivity [95%CI] | Specificity [95%CI] |
|------------------|-------------|----|----|----|----|---------------------|---------------------|
| Bouassa, f67.1   | 150         | 90 | 10 | 50 | 0  | 0.90 [0.82, 0.95]   | 1.00 [0.93, 1.00]   |

**Liaison**

| Author, Study ID | Sample size | TP  | FN | TN  | FP | Sensitivity [95%CI] | Specificity [95%CI] |
|------------------|-------------|-----|----|-----|----|---------------------|---------------------|
| Lefever, f70.1   | 414         | 138 | 66 | 210 | 0  | 0.68 [0.61, 0.74]   | 1.00 [0.98, 1.00]   |

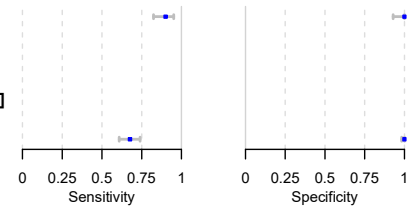

**Sofia**

| Author, Study ID    | Sample size | TP  | FN  | TN  | FP | Sensitivity [95%CI] | Specificity [95%CI] |
|---------------------|-------------|-----|-----|-----|----|---------------------|---------------------|
| Beck, a04.1         | 346         | 47  | 14  | 284 | 1  | 0.77 [0.64, 0.87]   | 1.00 [0.98, 1.00]   |
| Porte, a32.1        | 64          | 30  | 2   | 31  | 1  | 0.94 [0.79, 0.99]   | 0.97 [0.84, 1.00]   |
| Herrera, a46.1      | 1172        | 352 | 107 | 707 | 6  | 0.77 [0.72, 0.80]   | 0.99 [0.98, 1.00]   |
| Marti, f46.1        | 427         | 31  | 12  | 383 | 1  | 0.72 [0.56, 0.85]   | 1.00 [0.99, 1.00]   |
| Jääskeläinen, f50.1 | 188         | 119 | 29  | 40  | 0  | 0.80 [0.73, 0.86]   | 1.00 [0.91, 1.00]   |

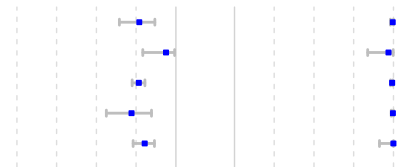

**Standard Q**

| Author, Study ID    | Sample size | TP  | FN | TN   | FP | Sensitivity [95%CI] | Specificity [95%CI] |
|---------------------|-------------|-----|----|------|----|---------------------|---------------------|
| Berger, a05.2       | 529         | 170 | 21 | 337  | 1  | 0.89 [0.84, 0.93]   | 1.00 [0.98, 1.00]   |
| Cerutti, a08.1      | 185         | 75  | 29 | 81   | 0  | 0.72 [0.62, 0.80]   | 1.00 [0.96, 1.00]   |
| Gupta, a13.1        | 330         | 63  | 14 | 252  | 1  | 0.82 [0.71, 0.90]   | 1.00 [0.98, 1.00]   |
| Igl...i, a15.1      | 970         | 158 | 28 | 780  | 4  | 0.85 [0.79, 0.90]   | 1.00 [0.99, 1.00]   |
| Krüttgen, a16.1     | 150         | 53  | 22 | 72   | 3  | 0.71 [0.59, 0.81]   | 0.96 [0.89, 0.99]   |
| Krüger, a17.1       | 1263        | 36  | 11 | 1207 | 9  | 0.77 [0.62, 0.88]   | 0.99 [0.99, 1.00]   |
| Lindner, a21.1      | 289         | 29  | 10 | 248  | 2  | 0.74 [0.58, 0.87]   | 0.99 [0.97, 1.00]   |
| Lindner, a21.2      | 289         | 31  | 8  | 249  | 1  | 0.80 [0.64, 0.91]   | 1.00 [0.98, 1.00]   |
| Nalumansi, a27.1    | 262         | 63  | 27 | 159  | 13 | 0.70 [0.59, 0.79]   | 0.92 [0.87, 0.96]   |
| Schildgen, a33.3    | 73          | 37  | 5  | 6    | 25 | 0.88 [0.74, 0.96]   | 0.19 [0.07, 0.38]   |
| Schwob, a35.1       | 333         | 104 | 8  | 221  | 0  | 0.93 [0.86, 0.97]   | 1.00 [0.98, 1.00]   |
| Lindner, a53.1      | 179         | 30  | 11 | 137  | 1  | 0.73 [0.57, 0.86]   | 0.99 [0.96, 1.00]   |
| Olearo, a54.1       | 184         | 41  | 43 | 100  | 0  | 0.49 [0.38, 0.60]   | 1.00 [0.96, 1.00]   |
| Chaimao, a57.1      | 454         | 59  | 1  | 389  | 5  | 0.98 [0.91, 1.00]   | 0.99 [0.97, 1.00]   |
| FINDdx, a64.1       | 400         | 94  | 12 | 287  | 7  | 0.89 [0.81, 0.94]   | 0.98 [0.95, 0.99]   |
| Turcato, f09.1      | 3410        | 179 | 44 | 3157 | 30 | 0.80 [0.74, 0.85]   | 0.99 [0.99, 0.99]   |
| Lindner, f15.1      | 146         | 34  | 6  | 105  | 1  | 0.85 [0.70, 0.94]   | 0.99 [0.95, 1.00]   |
| Möckel, f19.1       | 271         | 67  | 22 | 182  | 0  | 0.75 [0.65, 0.84]   | 1.00 [0.98, 1.00]   |
| Möckel, f19.2       | 202         | 18  | 7  | 176  | 1  | 0.72 [0.51, 0.88]   | 0.99 [0.97, 1.00]   |
| Osterman, f20.2     | 642         | 165 | 91 | 377  | 9  | 0.64 [0.58, 0.70]   | 0.98 [0.96, 0.99]   |
| Kannian, f26.1      | 37          | 15  | 12 | 10   | 0  | 0.56 [0.35, 0.74]   | 1.00 [0.69, 1.00]   |
| Kohmer, f32.2       | 100         | 32  | 42 | 26   | 0  | 0.43 [0.32, 0.55]   | 1.00 [0.87, 1.00]   |
| Baro, f33.3         | 286         | 44  | 57 | 178  | 7  | 0.44 [0.34, 0.54]   | 0.96 [0.92, 0.98]   |
| Caruana, f34.1      | 532         | 47  | 67 | 417  | 1  | 0.41 [0.32, 0.51]   | 1.00 [0.99, 1.00]   |
| Nikolai, f35.3      | 96          | 31  | 3  | 62   | 0  | 0.91 [0.76, 0.98]   | 1.00 [0.94, 1.00]   |
| Pena, f36.1         | 842         | 51  | 22 | 766  | 3  | 0.70 [0.58, 0.80]   | 1.00 [0.99, 1.00]   |
| Ristic, f44.1       | 120         | 25  | 18 | 77   | 0  | 0.58 [0.42, 0.73]   | 1.00 [0.95, 1.00]   |
| Jääskeläinen, f50.2 | 198         | 128 | 30 | 40   | 0  | 0.81 [0.74, 0.87]   | 1.00 [0.91, 1.00]   |
| Salvagno, f54.1     | 321         | 108 | 41 | 171  | 1  | 0.72 [0.65, 0.80]   | 0.99 [0.97, 1.00]   |
| Schuit, f64.2       | 1596        | 83  | 49 | 1456 | 8  | 0.63 [0.54, 0.71]   | 1.00 [0.99, 1.00]   |
| Kernéis, f69.1      | 1109        | 81  | 5  | 1013 | 10 | 0.94 [0.87, 0.98]   | 0.99 [0.98, 1.00]   |
| Thell, f81.1        | 541         | 171 | 42 | 325  | 3  | 0.80 [0.74, 0.85]   | 0.99 [0.97, 1.00]   |
| Homza, f87.4        | 139         | 26  | 16 | 96   | 1  | 0.62 [0.46, 0.76]   | 0.99 [0.94, 1.00]   |

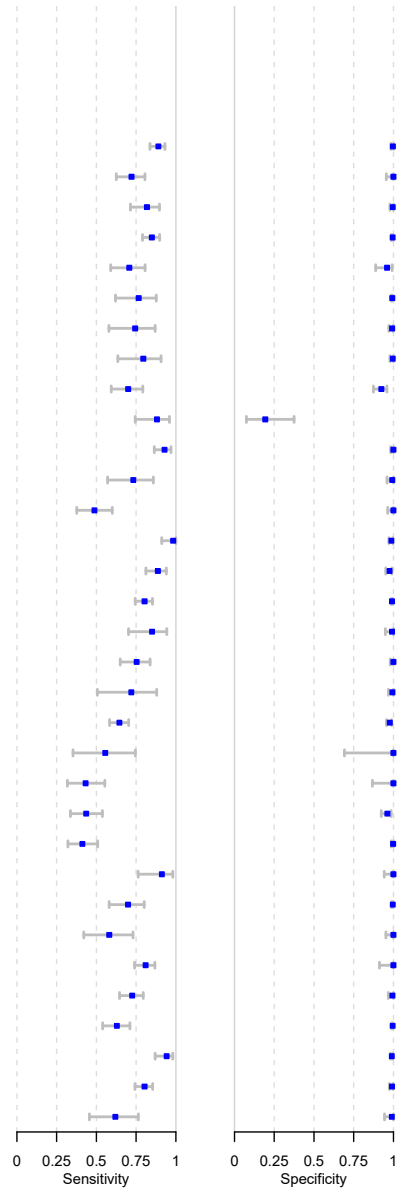

**Standard F**

| Author, Study ID | Sample size | TP  | FN | TN  | FP | Sensitivity [95%CI] | Specificity [95%CI] |
|------------------|-------------|-----|----|-----|----|---------------------|---------------------|
| Drevinek, a10.2  | 591         | 139 | 84 | 366 | 2  | 0.62 [0.56, 0.69]   | 1.00 [0.98, 1.00]   |
| Liotti, a22.1    | 359         | 49  | 55 | 251 | 4  | 0.47 [0.37, 0.57]   | 0.98 [0.96, 1.00]   |
| Porte, a32.2     | 64          | 29  | 3  | 31  | 1  | 0.91 [0.75, 0.98]   | 0.97 [0.84, 1.00]   |
| FINDdx, a63.1    | 453         | 93  | 27 | 326 | 7  | 0.78 [0.69, 0.85]   | 0.98 [0.96, 0.99]   |
| Osterman, f20.1  | 549         | 115 | 74 | 352 | 8  | 0.61 [0.54, 0.68]   | 0.98 [0.96, 0.99]   |
| FINDdx, a63.2    | 676         | 27  | 12 | 617 | 20 | 0.69 [0.52, 0.83]   | 0.97 [0.95, 0.98]   |

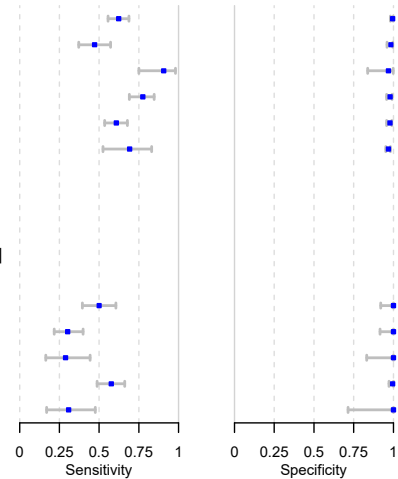

**Coris**

| Author, Study ID      | Sample size | TP | FN | TN  | FP | Sensitivity [95%CI] | Specificity [95%CI] |
|-----------------------|-------------|----|----|-----|----|---------------------|---------------------|
| Lambert-Niclot, a18.1 | 138         | 47 | 47 | 44  | 0  | 0.50 [0.40, 0.60]   | 1.00 [0.92, 1.00]   |
| Scohy, a34.1          | 148         | 32 | 74 | 42  | 0  | 0.30 [0.22, 0.40]   | 1.00 [0.92, 1.00]   |
| Veyrenche, a40.1      | 65          | 13 | 32 | 20  | 0  | 0.29 [0.16, 0.44]   | 1.00 [0.83, 1.00]   |
| Mertens, a48.1        | 328         | 76 | 56 | 195 | 1  | 0.58 [0.49, 0.66]   | 1.00 [0.97, 1.00]   |
| Ciotti, f24.1         | 50          | 12 | 27 | 11  | 0  | 0.31 [0.17, 0.48]   | 1.00 [0.72, 1.00]   |

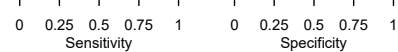

**Standard Q nasal**

| Author, Study ID | Sample size | TP  | FN | TN   | FP | Sensitivity [95%CI] | Specificity [95%CI] |
|------------------|-------------|-----|----|------|----|---------------------|---------------------|
| Lindner, f15.2   | 144         | 33  | 7  | 104  | 0  | 0.82 [0.67, 0.93]   | 1.00 [0.96, 1.00]   |
| Nikolai, f35.1   | 132         | 31  | 5  | 96   | 0  | 0.86 [0.70, 0.95]   | 1.00 [0.96, 1.00]   |
| Nikolai, f35.2   | 132         | 31  | 5  | 96   | 0  | 0.86 [0.70, 0.95]   | 1.00 [0.96, 1.00]   |
| Nikolai, f35.4   | 96          | 31  | 3  | 61   | 1  | 0.91 [0.76, 0.98]   | 0.98 [0.91, 1.00]   |
| Lindner, a53.2   | 179         | 33  | 8  | 136  | 2  | 0.80 [0.65, 0.91]   | 0.99 [0.95, 1.00]   |
| Stohr, f45.2     | 1588        | 118 | 74 | 1392 | 4  | 0.62 [0.54, 0.68]   | 1.00 [0.99, 1.00]   |

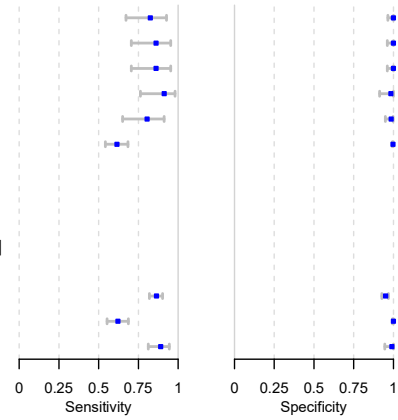

**Innova**

| Author, Study ID | Sample size | TP  | FN | TN  | FP | Sensitivity [95%CI] | Specificity [95%CI] |
|------------------|-------------|-----|----|-----|----|---------------------|---------------------|
| Houston, f25.1   | 728         | 242 | 38 | 426 | 22 | 0.86 [0.82, 0.90]   | 0.95 [0.93, 0.97]   |
| Young, f56.1     | 786         | 133 | 81 | 572 | 0  | 0.62 [0.55, 0.69]   | 1.00 [0.99, 1.00]   |
| Pickering, f73.1 | 200         | 89  | 11 | 99  | 1  | 0.89 [0.81, 0.94]   | 0.99 [0.95, 1.00]   |

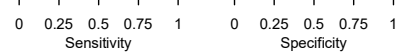

**VIRO AAZ**

| Author, Study ID | Sample size | TP  | FN | TN  | FP | Sensitivity [95%CI] | Specificity [95%CI] |
|------------------|-------------|-----|----|-----|----|---------------------|---------------------|
| Schwob, a35.3    | 324         | 116 | 22 | 186 | 0  | 0.84 [0.77, 0.90]   | 1.00 [0.98, 1.00]   |

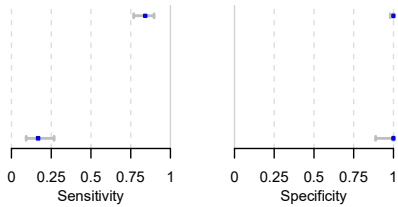

**Savant**

| Author, Study ID | Sample size | TP | FN | TN | FP | Sensitivity [95%CI] | Specificity [95%CI] |
|------------------|-------------|----|----|----|----|---------------------|---------------------|
| Weitzel, a41.3   | 109         | 13 | 65 | 31 | 0  | 0.17 [0.09, 0.27]   | 1.00 [0.89, 1.00]   |

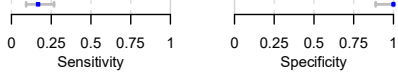

**VIVADiag**

| Author, Study ID | Sample size | TP | FN | TN  | FP | Sensitivity [95%CI] | Specificity [95%CI] |
|------------------|-------------|----|----|-----|----|---------------------|---------------------|
| Homza, f87.5     | 268         | 38 | 53 | 170 | 7  | 0.42 [0.32, 0.53]   | 0.96 [0.92, 0.98]   |

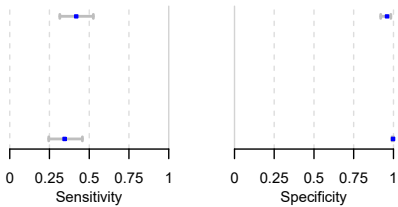

**ACCUCARE**

| Author, Study ID | Sample size | TP | FN | TN  | FP | Sensitivity [95%CI] | Specificity [95%CI] |
|------------------|-------------|----|----|-----|----|---------------------|---------------------|
| Thakur, f88.1    | 677         | 29 | 55 | 592 | 1  | 0.34 [0.24, 0.46]   | 1.00 [0.99, 1.00]   |

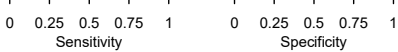

Supplement: pmed.1003735.s003.pdf [file pmed.1003735.s003.pdf]
