# Supplementary material for: Accuracy of novel antigen rapid diagnostics for SARS-CoV-2: A living systematic review and meta-analysis
Source: PubMed Central journal article supplement (PMC8389849; doi:10.1371/journal.pmed.1003735), 2021-08-12

## S4 Fig. Forest plots for subgroup analysis by CT-values.

Caption: CI = confidence interval

Fig A - Forest plot for CT values greater 20

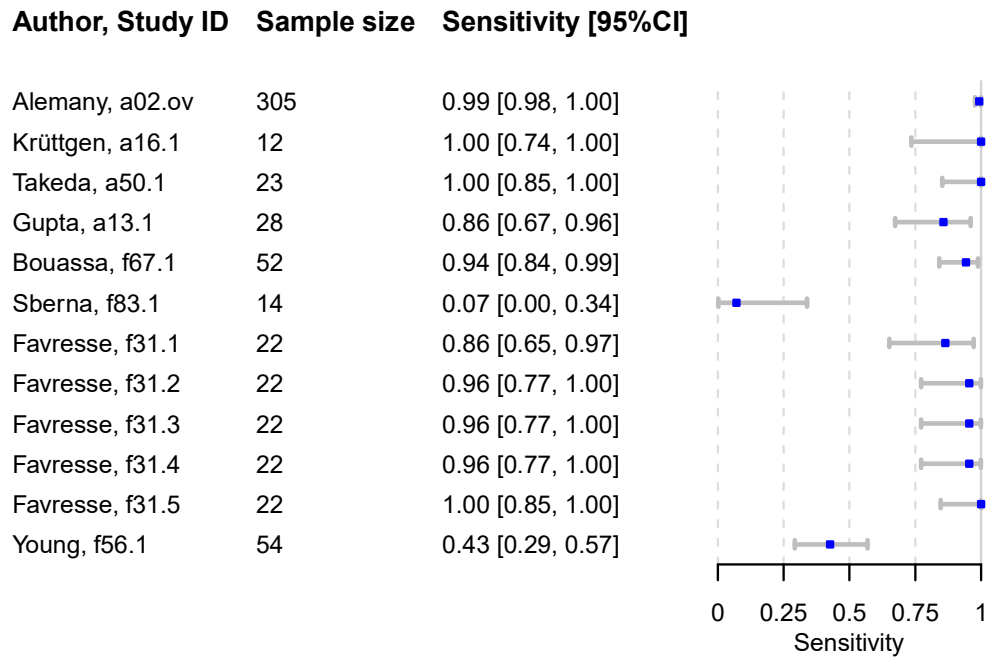

Fig B - Forest plot for CT values lower 20

**Author, Study ID Sample size Sensitivity [95%CI]**

| Author, Study ID   | Sample size | Sensitivity [95%CI] |
|--------------------|-------------|---------------------|
| Alemaný, a02.ov    | 258         | 0.98 [0.96, 1.00]   |
| Gupta, a13.1       | 5           | 0.80 [0.28, 1.00]   |
| Krüttgen, a16.1    | 5           | 1.00 [0.48, 1.00]   |
| Takeda, a50.1      | 9           | 1.00 [0.66, 1.00]   |
| Gupta, a13.1       | 27          | 0.96 [0.81, 1.00]   |
| Favresse, f31.1    | 2           | 1.00 [0.16, 1.00]   |
| Favresse, f31.2    | 2           | 0.50 [0.01, 0.99]   |
| Favresse, f31.3    | 2           | 1.00 [0.16, 1.00]   |
| Favresse, f31.4    | 2           | 1.00 [0.16, 1.00]   |
| Favresse, f31.5    | 2           | 1.00 [0.16, 1.00]   |
| Pena, f36.1        | 31          | 0.97 [0.83, 1.00]   |
| Young, f56.1       | 71          | 0.83 [0.72, 0.91]   |
| Faíco-Filho, f63.1 | 13          | 1.00 [0.75, 1.00]   |
| Bouassa, f67.1     | 25          | 1.00 [0.86, 1.00]   |
| Thell, f81.1       | 51          | 1.00 [0.93, 1.00]   |
| Sberna, f83.1      | 4           | 0.75 [0.19, 0.99]   |
| Favresse, f31.1    | 34          | 0.97 [0.85, 1.00]   |
| Favresse, f31.2    | 34          | 0.94 [0.80, 0.99]   |
| Favresse, f31.3    | 34          | 0.97 [0.85, 1.00]   |
| Favresse, f31.4    | 34          | 0.97 [0.85, 1.00]   |
| Favresse, f31.5    | 34          | 1.00 [0.90, 1.00]   |
| Young, f56.1       | 62          | 0.76 [0.63, 0.86]   |

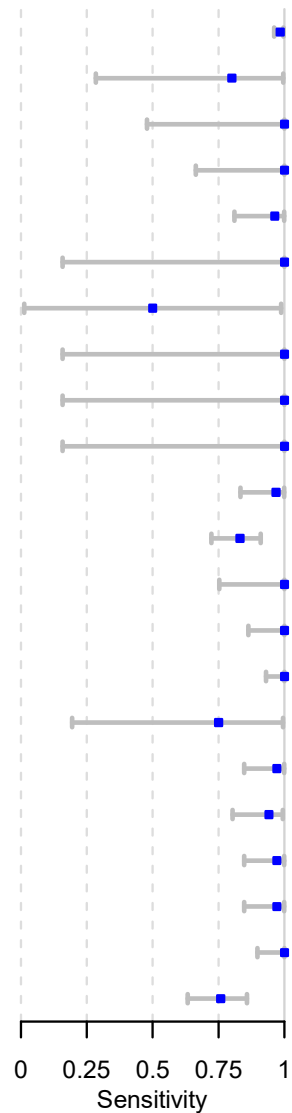

Fig C - Forest plot for CT values greater 25

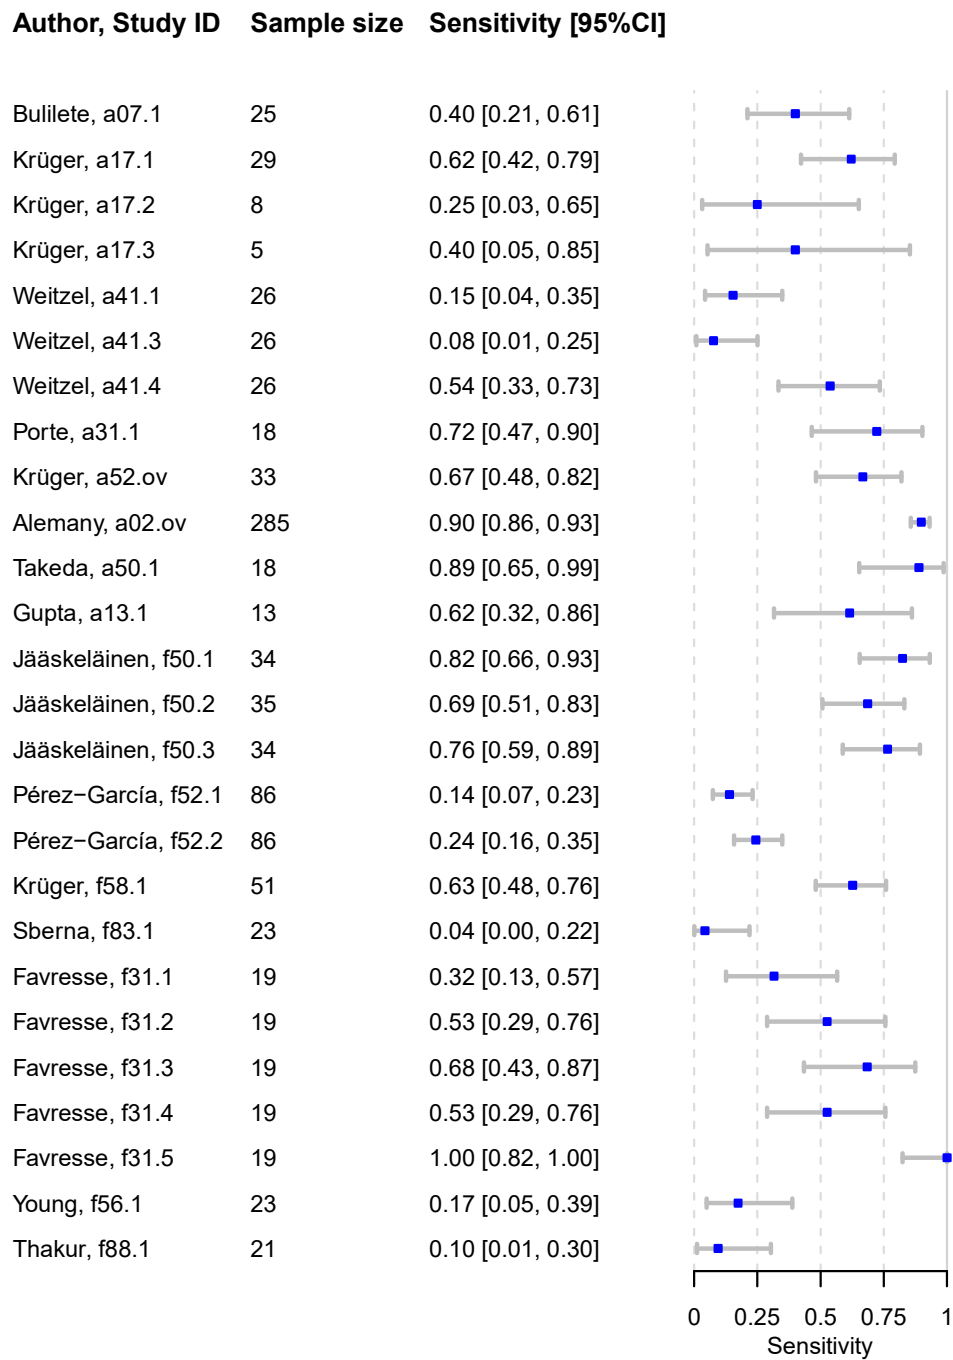

Fig D - Forest plot for CT values lower 25

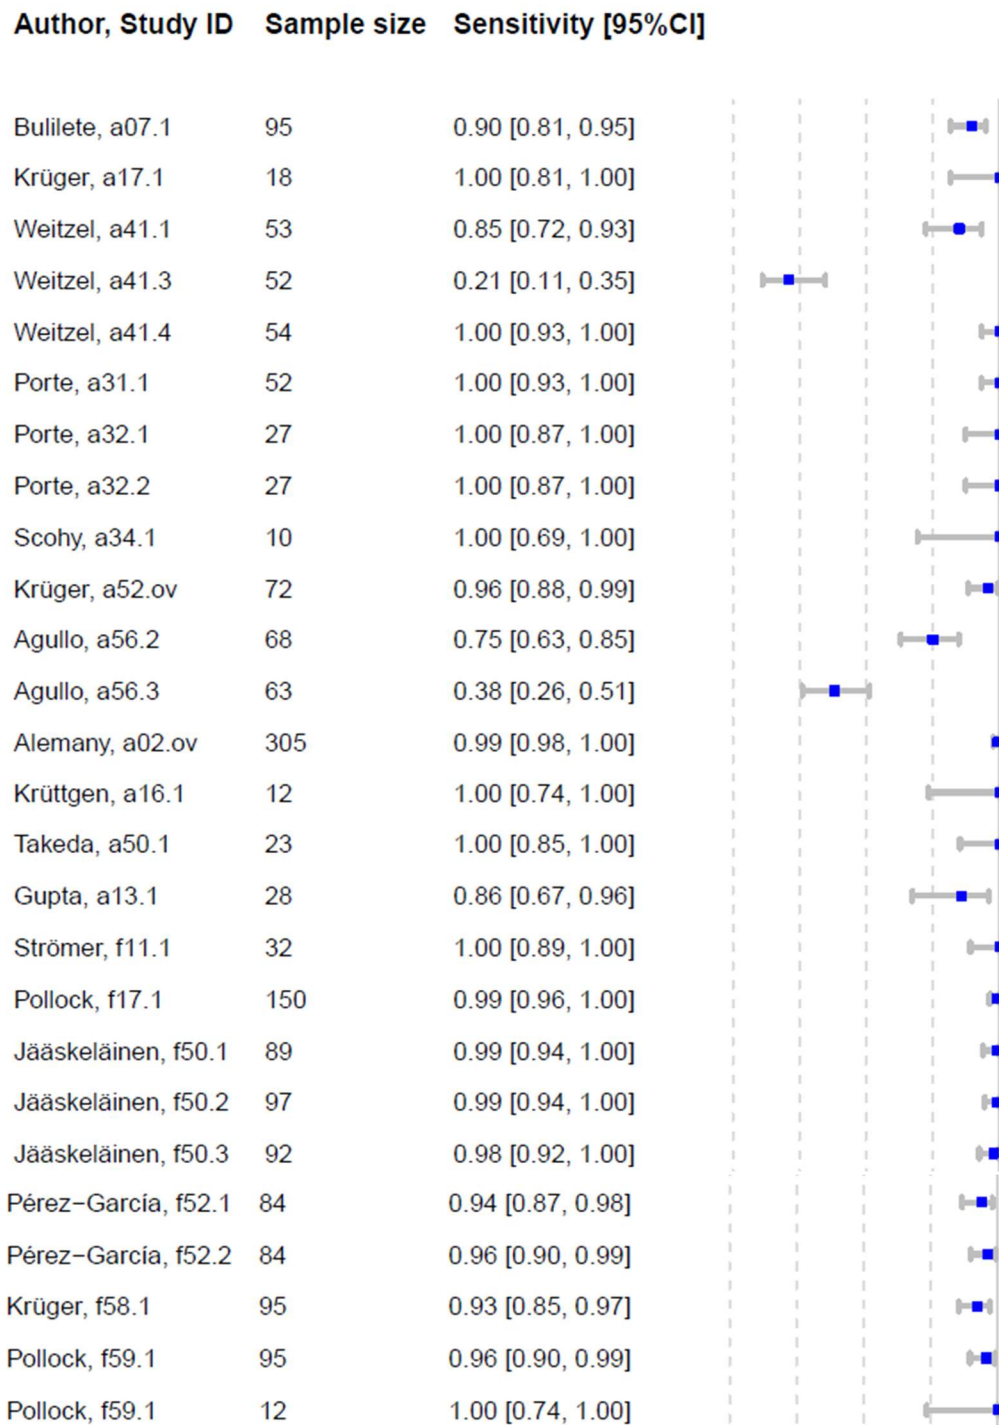

|                    |     |                   |
|--------------------|-----|-------------------|
| Pickering, f73.1   | 69  | 0.99 [0.92, 1.00] |
| Pickering, f73.2   | 69  | 0.94 [0.86, 0.98] |
| Pickering, f73.3   | 69  | 0.91 [0.82, 0.97] |
| Pickering, f73.4   | 69  | 0.96 [0.88, 0.99] |
| Pickering, f73.5   | 69  | 0.94 [0.86, 0.98] |
| Pickering, f73.6   | 69  | 0.88 [0.78, 0.95] |
| Pickering, f73.7   | 82  | 0.84 [0.74, 0.91] |
| Pickering, f73.8   | 66  | 0.97 [0.90, 1.00] |
| Pickering, f73.9   | 52  | 0.96 [0.87, 1.00] |
| Pena, f36.1        | 30  | 0.67 [0.47, 0.83] |
| Faico-Filho, f63.1 | 37  | 0.97 [0.86, 1.00] |
| Nörz, f78.1        | 171 | 1.00 [0.98, 1.00] |
| Thell, f81.1       | 125 | 0.98 [0.94, 1.00] |
| Sberna, f83.1      | 14  | 0.07 [0.00, 0.34] |
| Favresse, f31.1    | 22  | 0.86 [0.65, 0.97] |
| Favresse, f31.2    | 22  | 0.96 [0.77, 1.00] |
| Favresse, f31.3    | 22  | 0.96 [0.77, 1.00] |
| Favresse, f31.4    | 22  | 0.96 [0.77, 1.00] |
| Favresse, f31.5    | 22  | 1.00 [0.85, 1.00] |
| Young, f56.1       | 54  | 0.43 [0.29, 0.57] |
| Thakur, f88.1      | 60  | 0.45 [0.32, 0.58] |

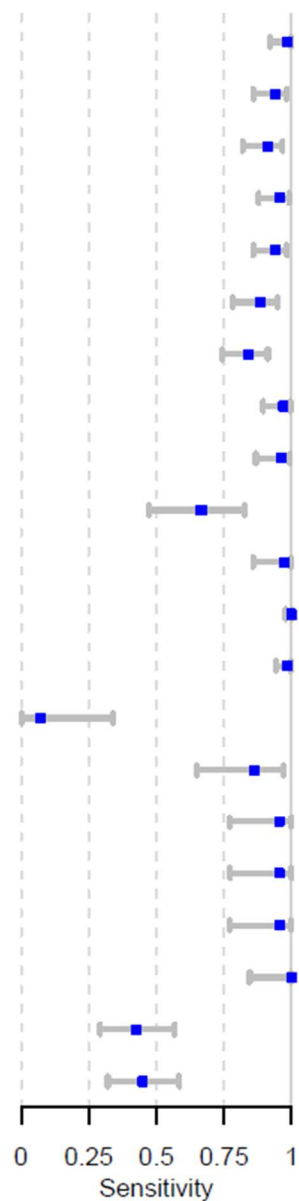

Fig E - forest plot for CT values greater 30

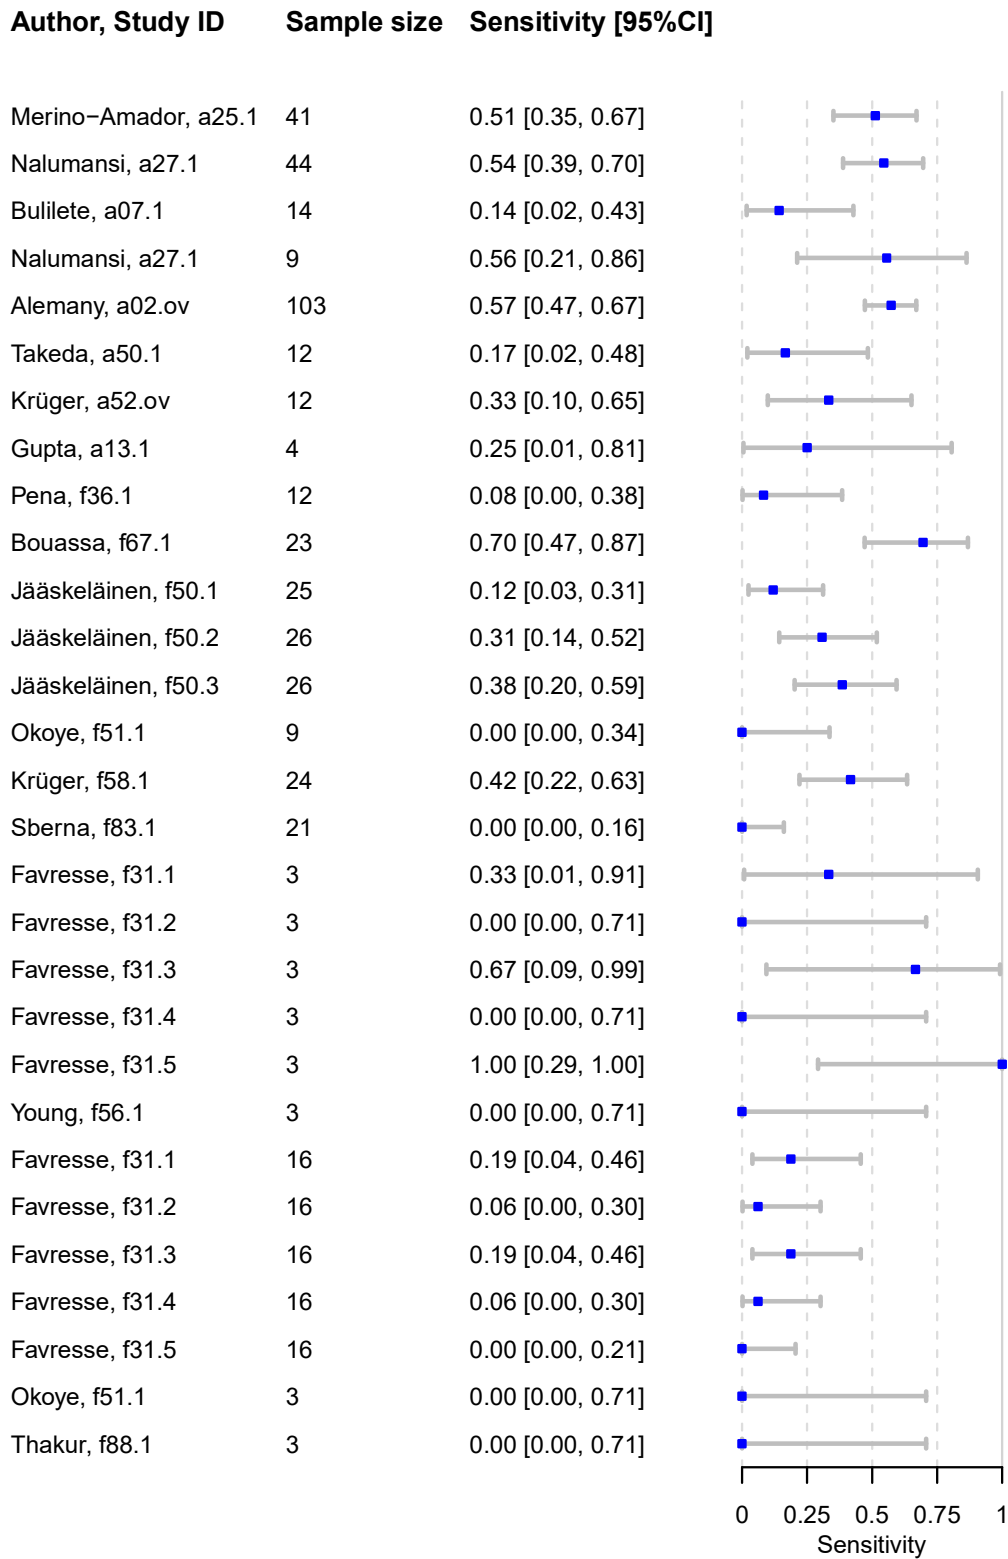

Fig F - forest plot for CT value lower 30

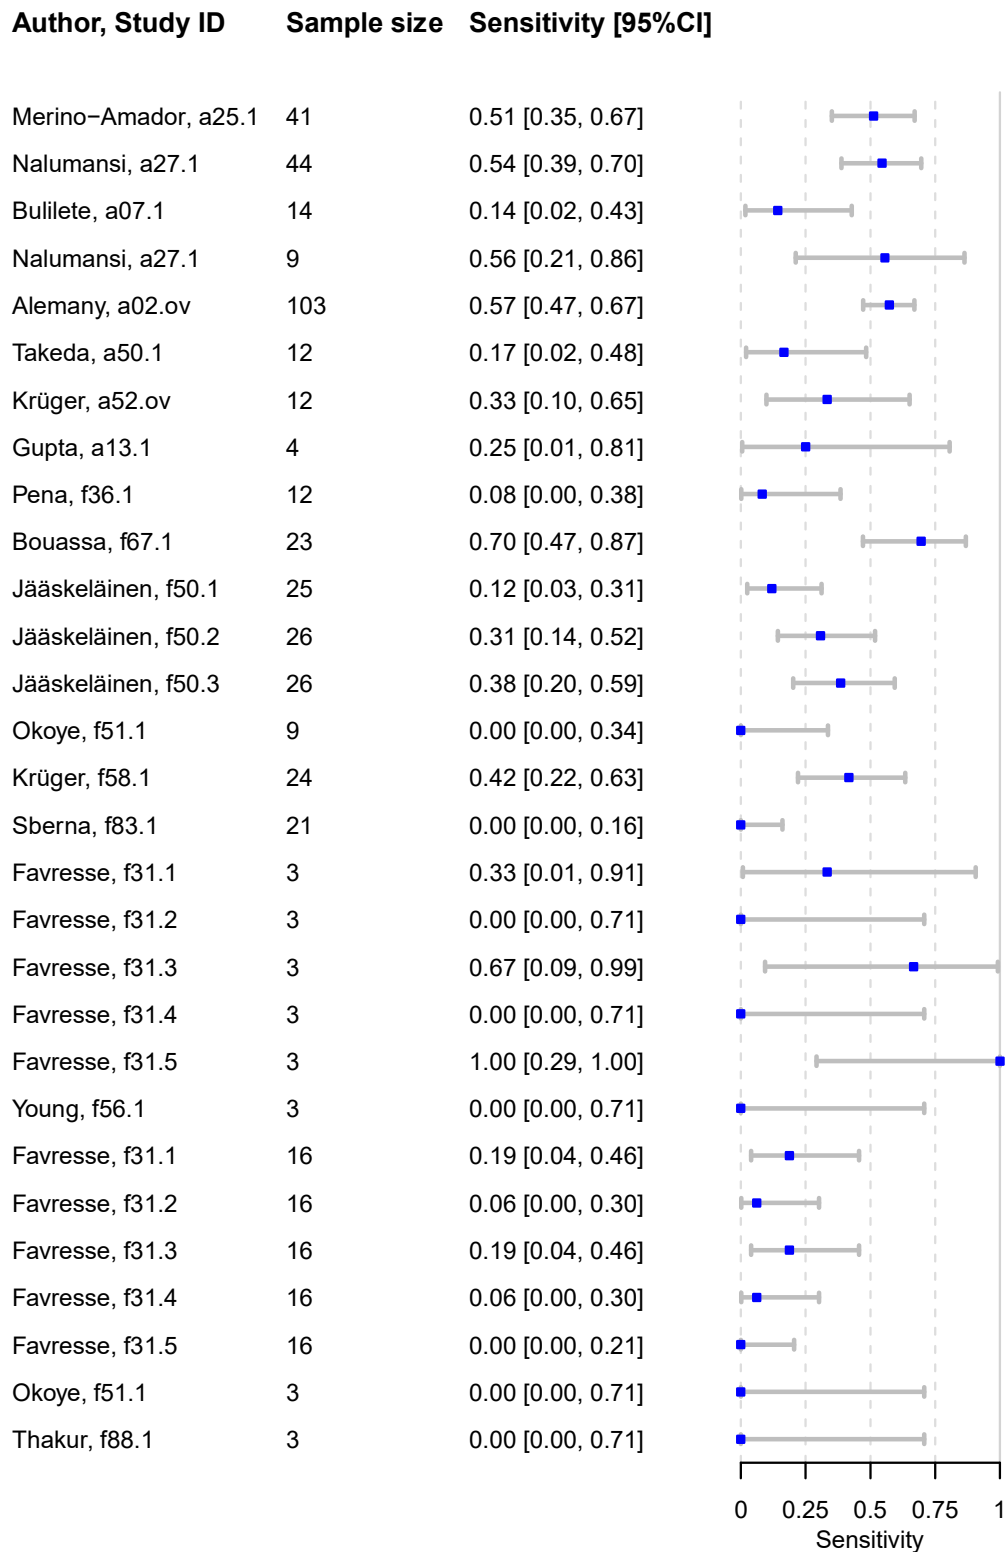

Supplement: pmed.1003735.s004.pdf [file pmed.1003735.s004.pdf]
