# Supplementary material for: Accuracy of novel antigen rapid diagnostics for SARS-CoV-2: A living systematic review and meta-analysis
Source: PubMed Central journal article supplement (PMC8389849; doi:10.1371/journal.pmed.1003735), 2021-08-12

## S6 Fig. Forest plots for subgroup analysis by IFU vs. non-IFU.

*Caption:* TP = true positive; FP = false positive; FN = false negative; TN = true negative; CI = confidence interval

Fig A - Forest Plot for IFU conforming studies

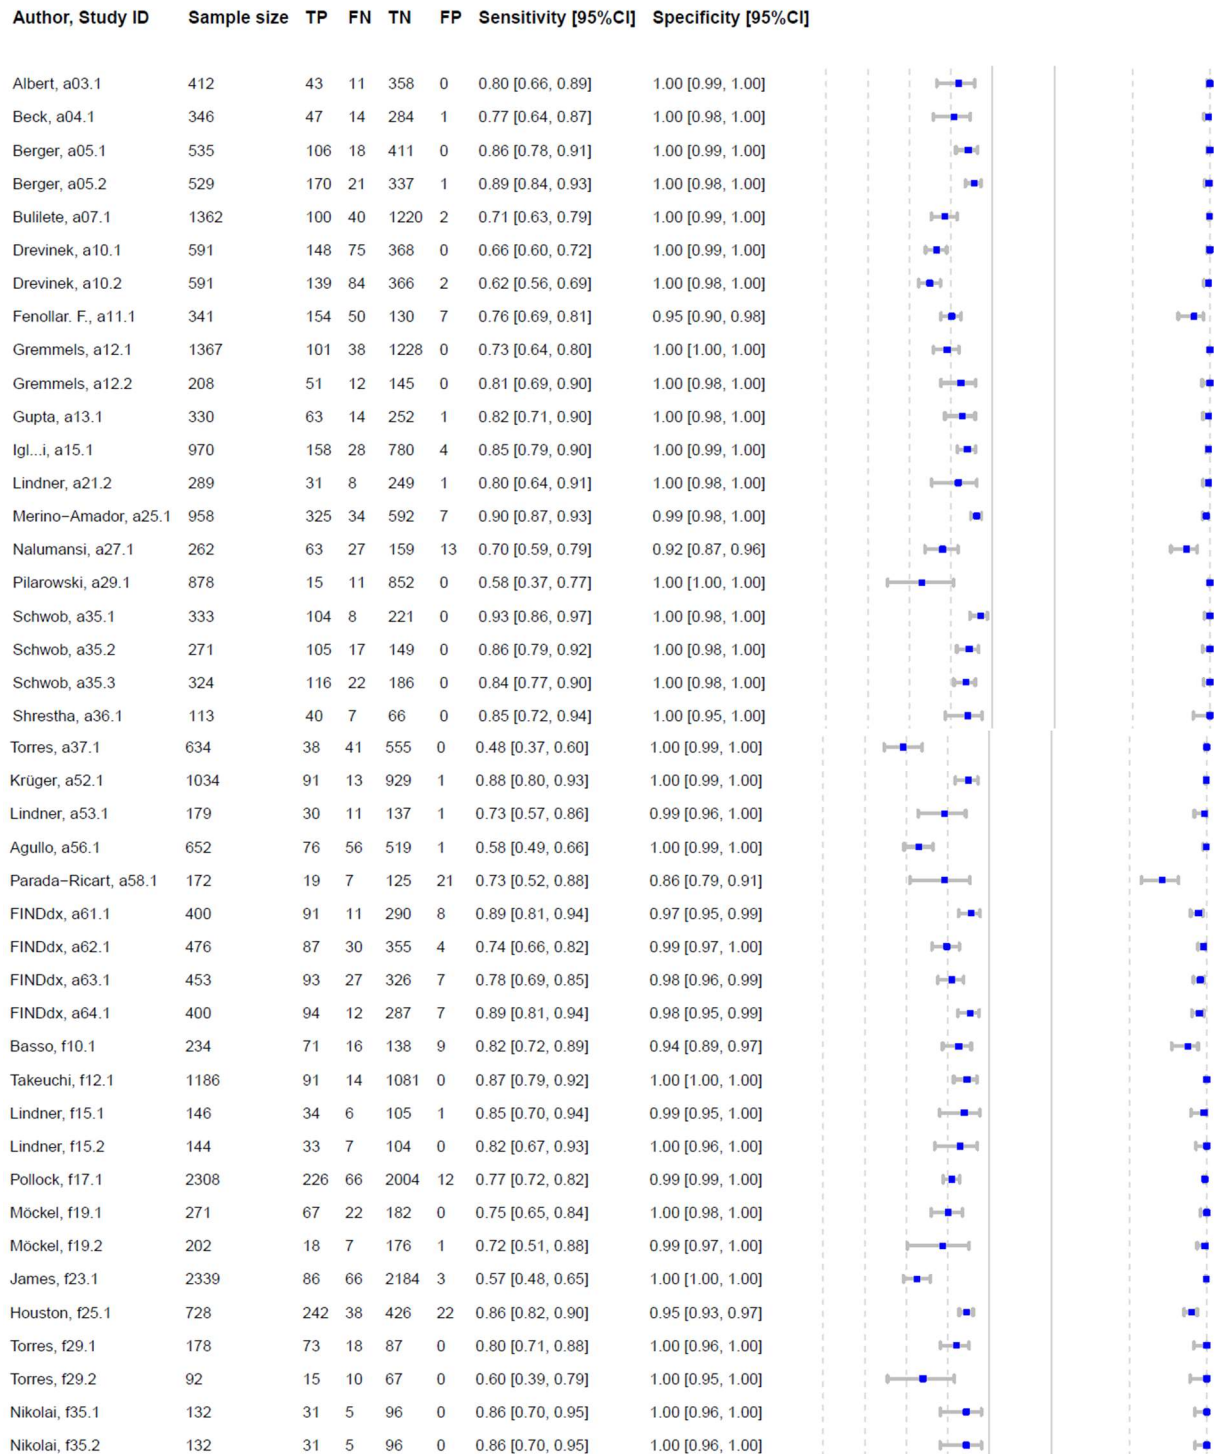

|                     |      |     |    |      |    |                   |                   |
|---------------------|------|-----|----|------|----|-------------------|-------------------|
| Nikolai, f35.3      | 96   | 31  | 3  | 62   | 0  | 0.91 [0.76, 0.98] | 1.00 [0.94, 1.00] |
| Nikolai, f35.4      | 96   | 31  | 3  | 61   | 1  | 0.91 [0.76, 0.98] | 0.98 [0.91, 1.00] |
| Pena, f36.1         | 842  | 51  | 22 | 766  | 3  | 0.70 [0.58, 0.80] | 1.00 [0.99, 1.00] |
| Lindner, a53.2      | 179  | 33  | 8  | 136  | 2  | 0.80 [0.65, 0.91] | 0.99 [0.95, 1.00] |
| FINDdx, f39.1       | 232  | 30  | 11 | 191  | 0  | 0.73 [0.57, 0.86] | 1.00 [0.98, 1.00] |
| FINDdx, f40.1       | 265  | 31  | 13 | 219  | 2  | 0.70 [0.55, 0.83] | 0.99 [0.97, 1.00] |
| FINDdx, f41.1       | 328  | 48  | 8  | 272  | 0  | 0.86 [0.74, 0.94] | 1.00 [0.99, 1.00] |
| FINDdx, f42.1       | 281  | 38  | 6  | 235  | 2  | 0.86 [0.73, 0.95] | 0.99 [0.97, 1.00] |
| FINDdx, f42.2       | 281  | 40  | 4  | 235  | 2  | 0.91 [0.78, 0.98] | 0.99 [0.97, 1.00] |
| Drain, f43.1        | 257  | 81  | 2  | 168  | 6  | 0.98 [0.92, 1.00] | 0.97 [0.93, 0.99] |
| Drain, f43.2        | 255  | 39  | 1  | 210  | 5  | 0.98 [0.87, 1.00] | 0.98 [0.95, 0.99] |
| Okoye, f51.1        | 2638 | 24  | 21 | 2593 | 0  | 0.53 [0.38, 0.68] | 1.00 [1.00, 1.00] |
| Villaverde, f55.1   | 1620 | 35  | 42 | 1540 | 3  | 0.46 [0.34, 0.57] | 1.00 [0.99, 1.00] |
| Krüger, f58.1       | 761  | 120 | 26 | 611  | 4  | 0.82 [0.75, 0.88] | 0.99 [0.98, 1.00] |
| Pollock, f59.1      | 1498 | 135 | 99 | 1243 | 21 | 0.58 [0.51, 0.64] | 0.98 [0.98, 0.99] |
| Shidlovskaya, f61.1 | 106  | 44  | 34 | 28   | 0  | 0.56 [0.45, 0.68] | 1.00 [0.88, 1.00] |
| Shidlovskaya, f61.2 | 106  | 41  | 37 | 27   | 1  | 0.53 [0.41, 0.64] | 0.96 [0.82, 1.00] |
| Faico-Filho, f63.1  | 127  | 59  | 11 | 56   | 1  | 0.84 [0.74, 0.92] | 0.98 [0.91, 1.00] |
| Schuit, f64.2       | 1596 | 83  | 49 | 1456 | 8  | 0.63 [0.54, 0.71] | 1.00 [0.99, 1.00] |
| Stokes, f65.1       | 1641 | 231 | 37 | 1371 | 2  | 0.86 [0.81, 0.90] | 1.00 [1.00, 1.00] |
| Kilic, f71.1        | 1384 | 77  | 39 | 1253 | 15 | 0.66 [0.57, 0.75] | 0.99 [0.98, 0.99] |
| L...Huillier, f72.1 | 822  | 78  | 41 | 702  | 1  | 0.66 [0.56, 0.74] | 1.00 [0.99, 1.00] |
| Asai, f74.1         | 305  | 49  | 14 | 238  | 4  | 0.78 [0.66, 0.87] | 0.98 [0.96, 1.00] |
| Osmanodja, f79.1    | 379  | 62  | 8  | 308  | 1  | 0.89 [0.79, 0.95] | 1.00 [0.98, 1.00] |
| Homza, f87.1        | 318  | 81  | 26 | 204  | 7  | 0.76 [0.66, 0.84] | 0.97 [0.93, 0.99] |
| Homza, f87.2        | 225  | 52  | 38 | 133  | 2  | 0.58 [0.47, 0.68] | 0.98 [0.95, 1.00] |
| Homza, f87.3        | 191  | 54  | 23 | 64   | 50 | 0.70 [0.59, 0.80] | 0.56 [0.47, 0.65] |
| Homza, f87.4        | 139  | 26  | 16 | 96   | 1  | 0.62 [0.46, 0.76] | 0.99 [0.94, 1.00] |
| Homza, f87.5        | 268  | 38  | 53 | 170  | 7  | 0.42 [0.32, 0.53] | 0.96 [0.92, 0.98] |
| Thakur, f88.1       | 677  | 29  | 55 | 592  | 1  | 0.34 [0.24, 0.46] | 1.00 [0.99, 1.00] |
| Wagenhäuser, f89.1  | 806  | 13  | 10 | 783  | 0  | 0.56 [0.34, 0.77] | 1.00 [1.00, 1.00] |
| Wagenhäuser, f89.3  | 3221 | 23  | 40 | 3146 | 12 | 0.36 [0.25, 0.50] | 1.00 [0.99, 1.00] |
| FINDdx, f91.1       | 218  | 71  | 8  | 137  | 2  | 0.90 [0.81, 0.96] | 0.99 [0.95, 1.00] |
| FINDdx, f91.2       | 218  | 71  | 8  | 137  | 2  | 0.90 [0.81, 0.96] | 0.99 [0.95, 1.00] |
| FINDdx, f92.1       | 723  | 88  | 24 | 611  | 0  | 0.79 [0.70, 0.86] | 1.00 [0.99, 1.00] |
| FINDdx, f93.1       | 665  | 176 | 18 | 471  | 0  | 0.91 [0.86, 0.94] | 1.00 [0.99, 1.00] |
| FINDdx, f94.1       | 462  | 61  | 8  | 390  | 3  | 0.88 [0.78, 0.95] | 0.99 [0.98, 1.00] |
| FINDdx, a62.2       | 1239 | 13  | 12 | 1214 | 0  | 0.52 [0.31, 0.72] | 1.00 [1.00, 1.00] |
| FINDdx, a63.2       | 676  | 27  | 12 | 617  | 20 | 0.69 [0.52, 0.83] | 0.97 [0.95, 0.98] |

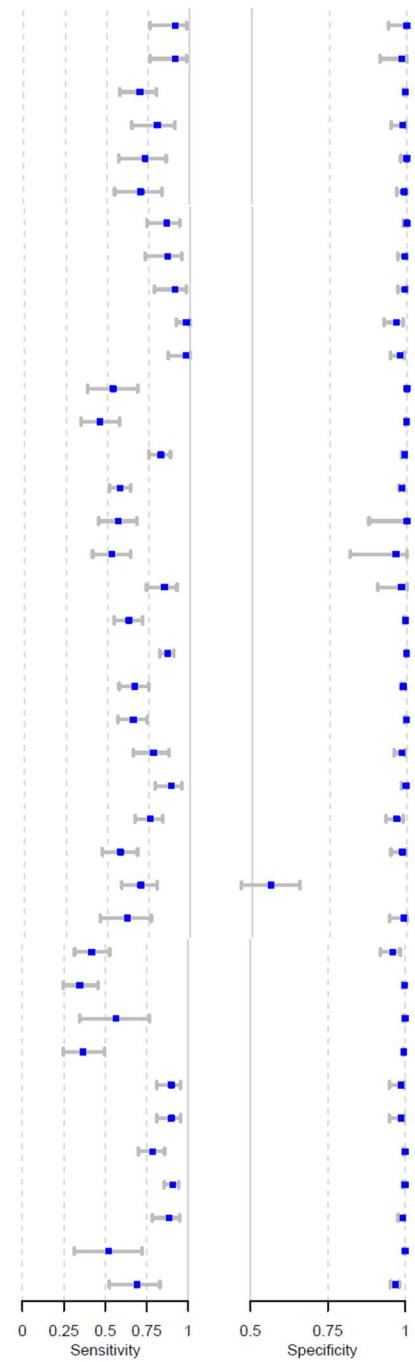

Fig B - Forest plot for non-IFU conforming studies

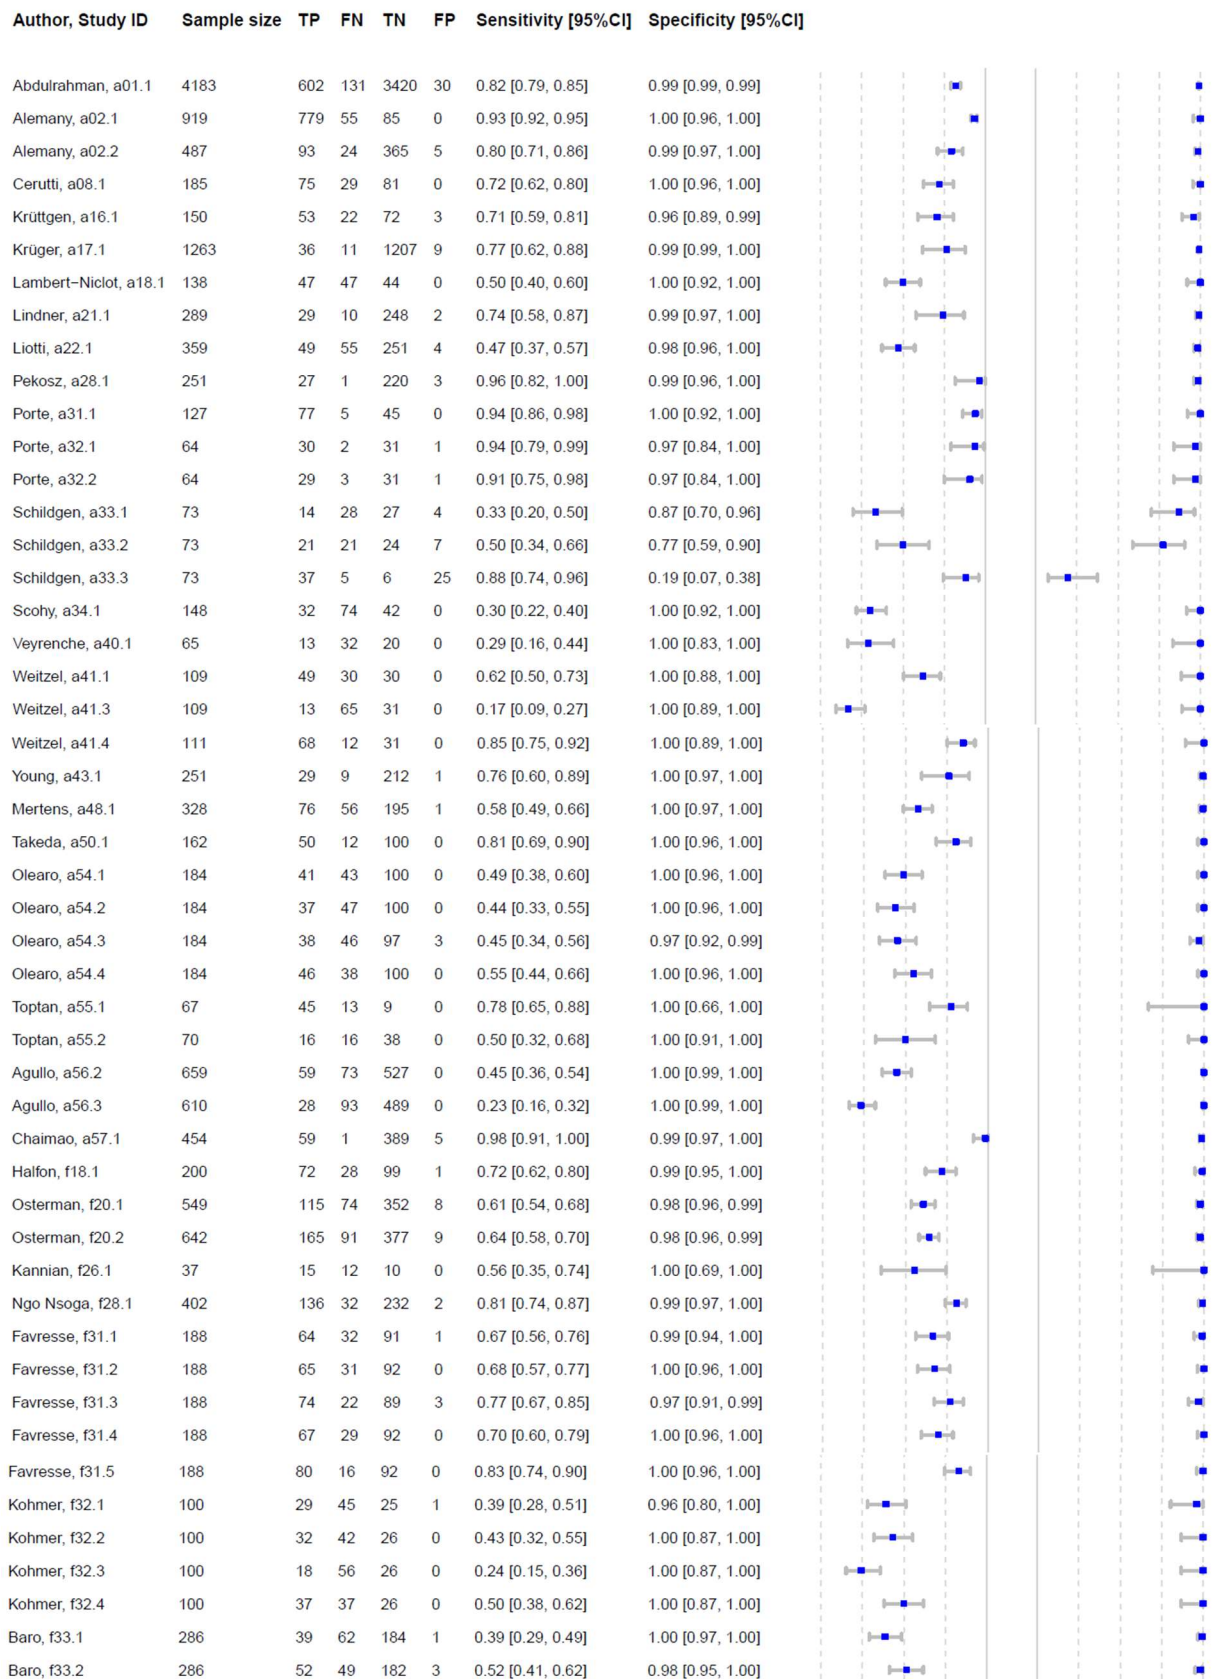

|                     |      |     |     |      |     |                   |                   |
|---------------------|------|-----|-----|------|-----|-------------------|-------------------|
| Baro, f33.3         | 286  | 44  | 57  | 178  | 7   | 0.44 [0.34, 0.54] | 0.96 [0.92, 0.98] |
| Baro, f33.4         | 286  | 46  | 55  | 165  | 20  | 0.46 [0.36, 0.56] | 0.89 [0.84, 0.93] |
| Baro, f33.5         | 286  | 29  | 72  | 181  | 4   | 0.29 [0.20, 0.39] | 0.98 [0.95, 0.99] |
| Caruana, f34.1      | 532  | 47  | 67  | 417  | 1   | 0.41 [0.32, 0.51] | 1.00 [0.99, 1.00] |
| Caruana, f34.2      | 532  | 47  | 67  | 416  | 2   | 0.41 [0.32, 0.51] | 1.00 [0.98, 1.00] |
| Caruana, f34.3      | 532  | 55  | 59  | 416  | 2   | 0.48 [0.39, 0.58] | 1.00 [0.98, 1.00] |
| Caruana, f34.4      | 532  | 47  | 67  | 417  | 1   | 0.41 [0.32, 0.51] | 1.00 [0.99, 1.00] |
| Hirotsu, f47.1      | 1029 | 37  | 3   | 989  | 0   | 0.92 [0.80, 0.98] | 1.00 [1.00, 1.00] |
| Jääskeläinen, f50.1 | 188  | 119 | 29  | 40   | 0   | 0.80 [0.73, 0.86] | 1.00 [0.91, 1.00] |
| Jääskeläinen, f50.2 | 198  | 128 | 30  | 40   | 0   | 0.81 [0.74, 0.87] | 1.00 [0.91, 1.00] |
| Jääskeläinen, f50.3 | 190  | 126 | 26  | 38   | 0   | 0.83 [0.76, 0.88] | 1.00 [0.91, 1.00] |
| Pérez-García, f52.1 | 320  | 91  | 79  | 150  | 0   | 0.54 [0.46, 0.61] | 1.00 [0.98, 1.00] |
| Pérez-García, f52.2 | 320  | 102 | 68  | 150  | 0   | 0.60 [0.52, 0.67] | 1.00 [0.98, 1.00] |
| Salvagno, f54.1     | 321  | 108 | 41  | 171  | 1   | 0.72 [0.65, 0.80] | 0.99 [0.97, 1.00] |
| Gili, f57.1         | 226  | 86  | 9   | 120  | 11  | 0.90 [0.83, 0.96] | 0.92 [0.86, 0.96] |
| Gili, f57.2         | 1738 | 90  | 0   | 1518 | 130 | 1.00 [0.96, 1.00] | 0.92 [0.91, 0.93] |
| Schuit, f64.1       | 2678 | 149 | 84  | 2436 | 9   | 0.64 [0.57, 0.70] | 1.00 [0.99, 1.00] |
| Bouassa, f67.1      | 150  | 90  | 10  | 50   | 0   | 0.90 [0.82, 0.95] | 1.00 [0.93, 1.00] |
| Lefever, f70.1      | 414  | 138 | 66  | 210  | 0   | 0.68 [0.61, 0.74] | 1.00 [0.98, 1.00] |
| Pickering, f73.1    | 200  | 89  | 11  | 99   | 1   | 0.89 [0.81, 0.94] | 0.99 [0.95, 1.00] |
| Pickering, f73.2    | 200  | 75  | 25  | 86   | 14  | 0.75 [0.65, 0.83] | 0.86 [0.78, 0.92] |
| Pickering, f73.3    | 200  | 65  | 35  | 100  | 0   | 0.65 [0.55, 0.74] | 1.00 [0.96, 1.00] |
| Pickering, f73.4    | 200  | 77  | 23  | 98   | 2   | 0.77 [0.68, 0.85] | 0.98 [0.93, 1.00] |
| Pickering, f73.5    | 200  | 74  | 26  | 100  | 0   | 0.74 [0.64, 0.82] | 1.00 [0.96, 1.00] |
| Pickering, f73.6    | 200  | 69  | 31  | 98   | 2   | 0.69 [0.59, 0.78] | 0.98 [0.93, 1.00] |
| Nörz, f78.1         | 3139 | 236 | 156 | 2743 | 4   | 0.60 [0.55, 0.65] | 1.00 [1.00, 1.00] |

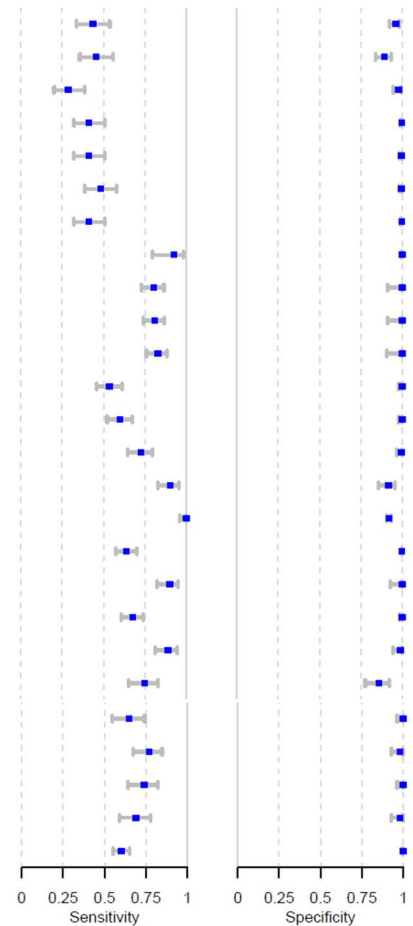

Supplement: pmed.1003735.s006.pdf [file pmed.1003735.s006.pdf]
