# Supplementary material for: Accuracy of novel antigen rapid diagnostics for SARS-CoV-2: A living systematic review and meta-analysis
Source: PubMed Central journal article supplement (PMC8389849; doi:10.1371/journal.pmed.1003735), 2021-08-12

## S7 Fig. Forest plots for subgroup analysis by sample type.

Caption: TP = true positive; FP = false positive; FN = false negative; TN = true negative; CI = confidence interval

Fig A - Forest plot for anterior nasal and mid-turbinate samples

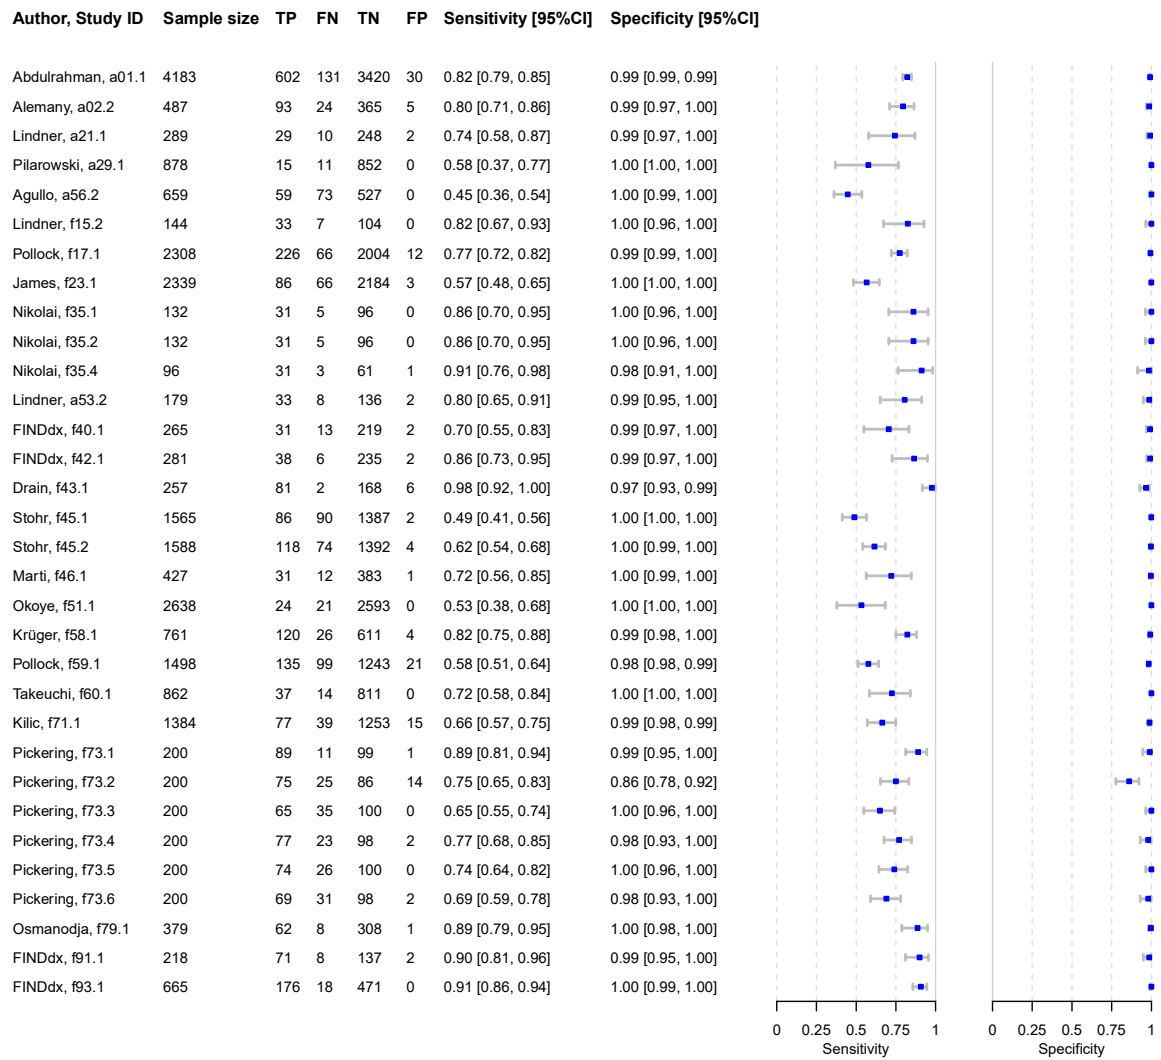

Fig B - Forest plot for nasopharyngeal and nasopharyngeal/oropharyngeal samples

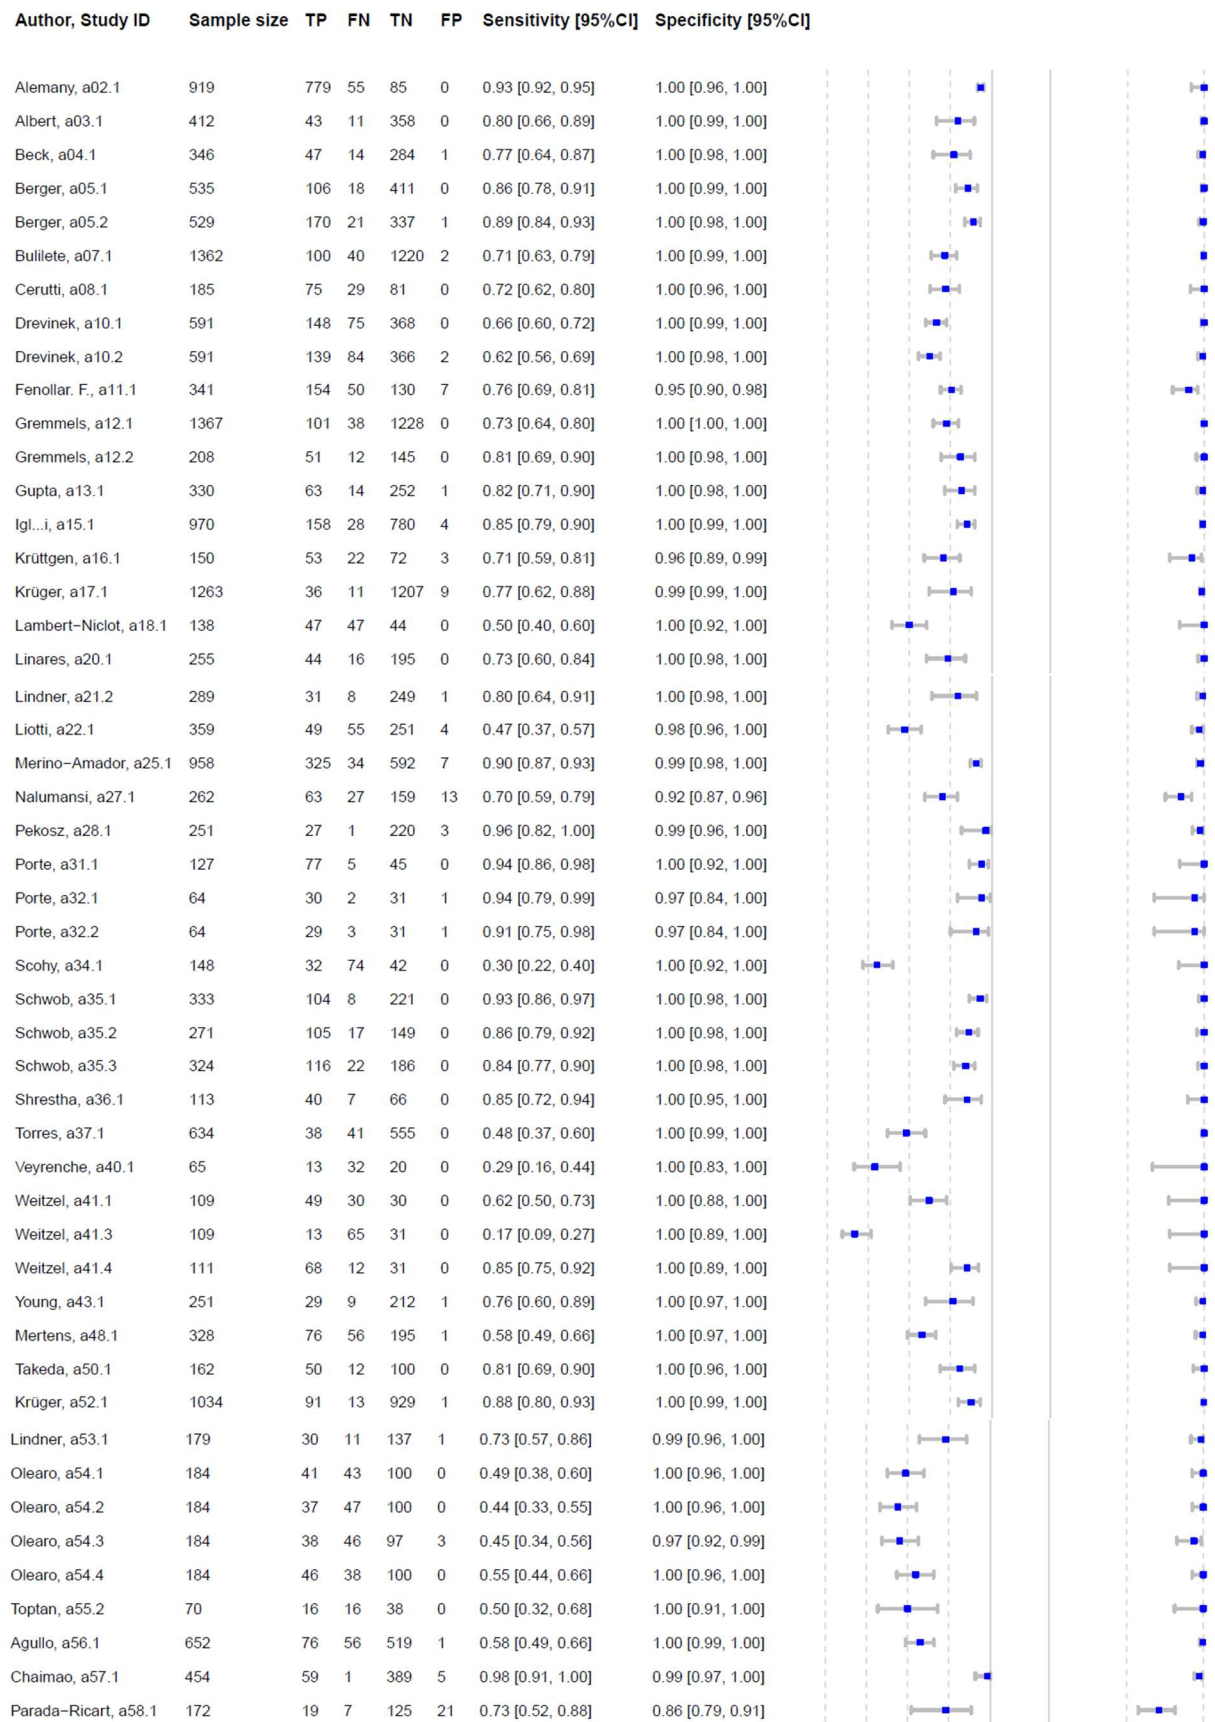

|                     |      |     |    |      |    |                   |                   |  |  |
|---------------------|------|-----|----|------|----|-------------------|-------------------|--|--|
| FINDdx, a61.1       | 400  | 91  | 11 | 290  | 8  | 0.89 [0.81, 0.94] | 0.97 [0.95, 0.99] |  |  |
| FINDdx, a62.1       | 476  | 87  | 30 | 355  | 4  | 0.74 [0.66, 0.82] | 0.99 [0.97, 1.00] |  |  |
| FINDdx, a63.1       | 453  | 93  | 27 | 326  | 7  | 0.78 [0.69, 0.85] | 0.98 [0.96, 0.99] |  |  |
| FINDdx, a64.1       | 400  | 94  | 12 | 287  | 7  | 0.89 [0.81, 0.94] | 0.98 [0.95, 0.99] |  |  |
| Turcato, f09.1      | 3410 | 179 | 44 | 3157 | 30 | 0.80 [0.74, 0.85] | 0.99 [0.99, 0.99] |  |  |
| Basso, f10.1        | 234  | 71  | 16 | 138  | 9  | 0.82 [0.72, 0.89] | 0.94 [0.89, 0.97] |  |  |
| Takeuchi, f12.1     | 1186 | 91  | 14 | 1081 | 0  | 0.87 [0.79, 0.92] | 1.00 [1.00, 1.00] |  |  |
| Filgueiras, f14.1   | 139  | 38  | 17 | 83   | 1  | 0.69 [0.55, 0.81] | 0.99 [0.94, 1.00] |  |  |
| Lindner, f15.1      | 146  | 34  | 6  | 105  | 1  | 0.85 [0.70, 0.94] | 0.99 [0.95, 1.00] |  |  |
| Halfon, f18.1       | 200  | 72  | 28 | 99   | 1  | 0.72 [0.62, 0.80] | 0.99 [0.95, 1.00] |  |  |
| Möckel, f19.1       | 271  | 67  | 22 | 182  | 0  | 0.75 [0.65, 0.84] | 1.00 [0.98, 1.00] |  |  |
| Möckel, f19.2       | 202  | 18  | 7  | 176  | 1  | 0.72 [0.51, 0.88] | 0.99 [0.97, 1.00] |  |  |
| Osterman, f20.1     | 549  | 115 | 74 | 352  | 8  | 0.61 [0.54, 0.68] | 0.98 [0.96, 0.99] |  |  |
| Osterman, f20.2     | 642  | 165 | 91 | 377  | 9  | 0.64 [0.58, 0.70] | 0.98 [0.96, 0.99] |  |  |
| Ciotti, f24.1       | 50   | 12  | 27 | 11   | 0  | 0.31 [0.17, 0.48] | 1.00 [0.72, 1.00] |  |  |
| Houston, f25.1      | 728  | 242 | 38 | 426  | 22 | 0.86 [0.82, 0.90] | 0.95 [0.93, 0.97] |  |  |
| Ngo Nsoga, f28.1    | 402  | 136 | 32 | 232  | 2  | 0.81 [0.74, 0.87] | 0.99 [0.97, 1.00] |  |  |
| Torres, f29.1       | 178  | 73  | 18 | 87   | 0  | 0.80 [0.71, 0.88] | 1.00 [0.96, 1.00] |  |  |
| Torres, f29.2       | 92   | 15  | 10 | 67   | 0  | 0.60 [0.39, 0.79] | 1.00 [0.95, 1.00] |  |  |
| Akingba, f30.1      | 657  | 101 | 44 | 509  | 3  | 0.70 [0.62, 0.77] | 0.99 [0.98, 1.00] |  |  |
| Favresse, f31.1     | 188  | 64  | 32 | 91   | 1  | 0.67 [0.56, 0.76] | 0.99 [0.94, 1.00] |  |  |
| Favresse, f31.2     | 188  | 65  | 31 | 92   | 0  | 0.68 [0.57, 0.77] | 1.00 [0.96, 1.00] |  |  |
| Favresse, f31.3     | 188  | 74  | 22 | 89   | 3  | 0.77 [0.67, 0.85] | 0.97 [0.91, 0.99] |  |  |
| Favresse, f31.4     | 188  | 67  | 29 | 92   | 0  | 0.70 [0.60, 0.79] | 1.00 [0.96, 1.00] |  |  |
| Favresse, f31.5     | 188  | 80  | 16 | 92   | 0  | 0.83 [0.74, 0.90] | 1.00 [0.96, 1.00] |  |  |
| Kohmer, f32.1       | 100  | 29  | 45 | 25   | 1  | 0.39 [0.28, 0.51] | 0.96 [0.80, 1.00] |  |  |
| Kohmer, f32.2       | 100  | 32  | 42 | 26   | 0  | 0.43 [0.32, 0.55] | 1.00 [0.87, 1.00] |  |  |
| Kohmer, f32.3       | 100  | 18  | 56 | 26   | 0  | 0.24 [0.15, 0.36] | 1.00 [0.87, 1.00] |  |  |
| Kohmer, f32.4       | 100  | 37  | 37 | 26   | 0  | 0.50 [0.38, 0.62] | 1.00 [0.87, 1.00] |  |  |
| Baro, f33.1         | 286  | 39  | 62 | 184  | 1  | 0.39 [0.29, 0.49] | 1.00 [0.97, 1.00] |  |  |
| Baro, f33.2         | 286  | 52  | 49 | 182  | 3  | 0.52 [0.41, 0.62] | 0.98 [0.95, 1.00] |  |  |
| Baro, f33.3         | 286  | 44  | 57 | 178  | 7  | 0.44 [0.34, 0.54] | 0.96 [0.92, 0.98] |  |  |
| Baro, f33.4         | 286  | 46  | 55 | 165  | 20 | 0.46 [0.36, 0.56] | 0.89 [0.84, 0.93] |  |  |
| Baro, f33.5         | 286  | 29  | 72 | 181  | 4  | 0.29 [0.20, 0.39] | 0.98 [0.95, 0.99] |  |  |
| Caruana, f34.1      | 532  | 47  | 67 | 417  | 1  | 0.41 [0.32, 0.51] | 1.00 [0.99, 1.00] |  |  |
| Caruana, f34.2      | 532  | 47  | 67 | 416  | 2  | 0.41 [0.32, 0.51] | 1.00 [0.98, 1.00] |  |  |
| Caruana, f34.3      | 532  | 55  | 59 | 416  | 2  | 0.48 [0.39, 0.58] | 1.00 [0.98, 1.00] |  |  |
| Caruana, f34.4      | 532  | 47  | 67 | 417  | 1  | 0.41 [0.32, 0.51] | 1.00 [0.99, 1.00] |  |  |
| Nikolai, f35.3      | 96   | 31  | 3  | 62   | 0  | 0.91 [0.76, 0.98] | 1.00 [0.94, 1.00] |  |  |
| Pena, f36.1         | 842  | 51  | 22 | 766  | 3  | 0.70 [0.58, 0.80] | 1.00 [0.99, 1.00] |  |  |
| FINDdx, f39.1       | 232  | 30  | 11 | 191  | 0  | 0.73 [0.57, 0.86] | 1.00 [0.98, 1.00] |  |  |
| FINDdx, f41.1       | 328  | 48  | 8  | 272  | 0  | 0.86 [0.74, 0.94] | 1.00 [0.99, 1.00] |  |  |
| FINDdx, f42.2       | 281  | 40  | 4  | 235  | 2  | 0.91 [0.78, 0.98] | 0.99 [0.97, 1.00] |  |  |
| Drain, f43.2        | 255  | 39  | 1  | 210  | 5  | 0.98 [0.87, 1.00] | 0.98 [0.95, 0.99] |  |  |
| Ristic, f44.1       | 120  | 25  | 18 | 77   | 0  | 0.58 [0.42, 0.73] | 1.00 [0.95, 1.00] |  |  |
| Hirotsu, f47.1      | 1029 | 37  | 3  | 989  | 0  | 0.92 [0.80, 0.98] | 1.00 [1.00, 1.00] |  |  |
| Jääskeläinen, f50.1 | 188  | 119 | 29 | 40   | 0  | 0.80 [0.73, 0.86] | 1.00 [0.91, 1.00] |  |  |
| Jääskeläinen, f50.2 | 198  | 128 | 30 | 40   | 0  | 0.81 [0.74, 0.87] | 1.00 [0.91, 1.00] |  |  |
| Jääskeläinen, f50.3 | 190  | 126 | 26 | 38   | 0  | 0.83 [0.76, 0.88] | 1.00 [0.91, 1.00] |  |  |
| Pérez-García, f52.1 | 320  | 91  | 79 | 150  | 0  | 0.54 [0.46, 0.61] | 1.00 [0.98, 1.00] |  |  |
| Pérez-García, f52.2 | 320  | 102 | 68 | 150  | 0  | 0.60 [0.52, 0.67] | 1.00 [0.98, 1.00] |  |  |
| Salvagno, f54.1     | 321  | 108 | 41 | 171  | 1  | 0.72 [0.65, 0.80] | 0.99 [0.97, 1.00] |  |  |

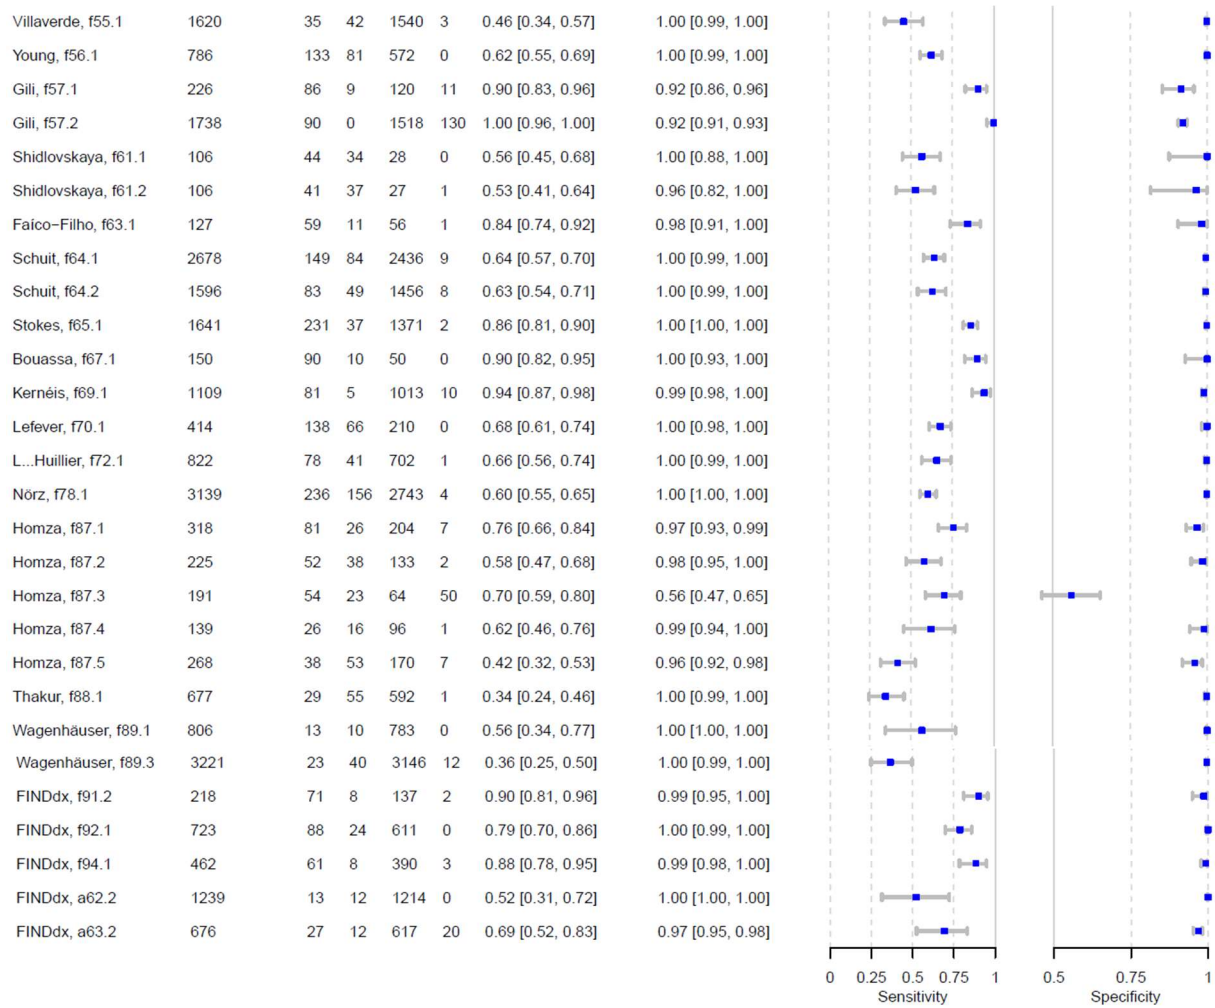

Fig C - Forest plot for oropharyngeal samples

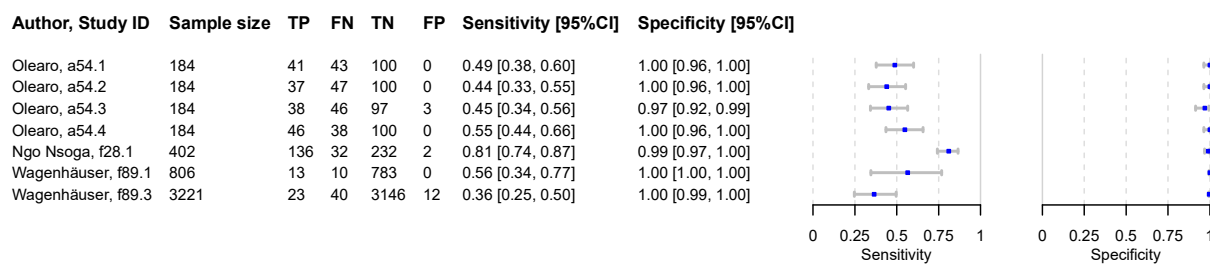

Supplement: pmed.1003735.s007.pdf [file pmed.1003735.s007.pdf]
