# Supplementary material for: Accuracy of novel antigen rapid diagnostics for SARS-CoV-2: A living systematic review and meta-analysis
Source: PubMed Central journal article supplement (PMC8389849; doi:10.1371/journal.pmed.1003735), 2021-08-12

**S2 Fig. HSROC curve Standard Q Ag-RDT.**

*Caption: HSROC = Hierarchical summary receiver-operating characteristic*

Figure A - HSROC curve Standard Q Ag-RDT

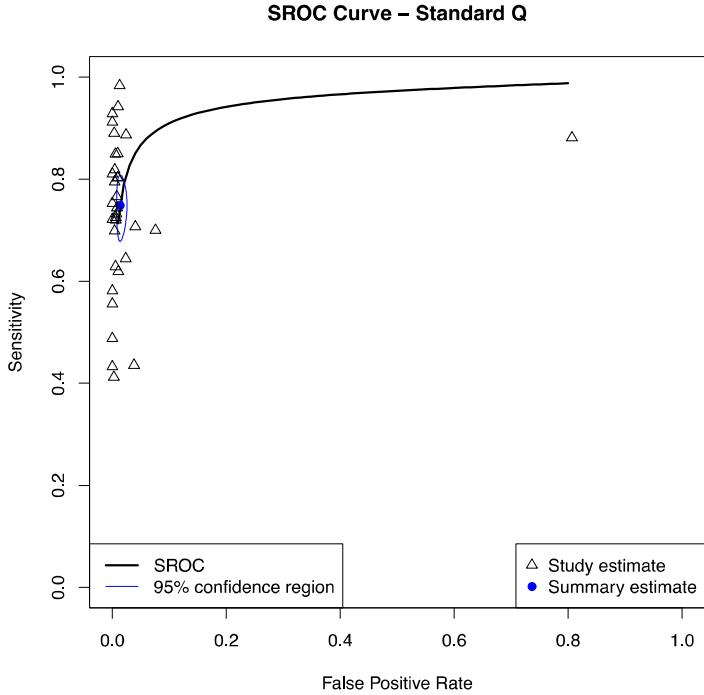

Figure B - HSROC curve LumiraDx Ag-RDT

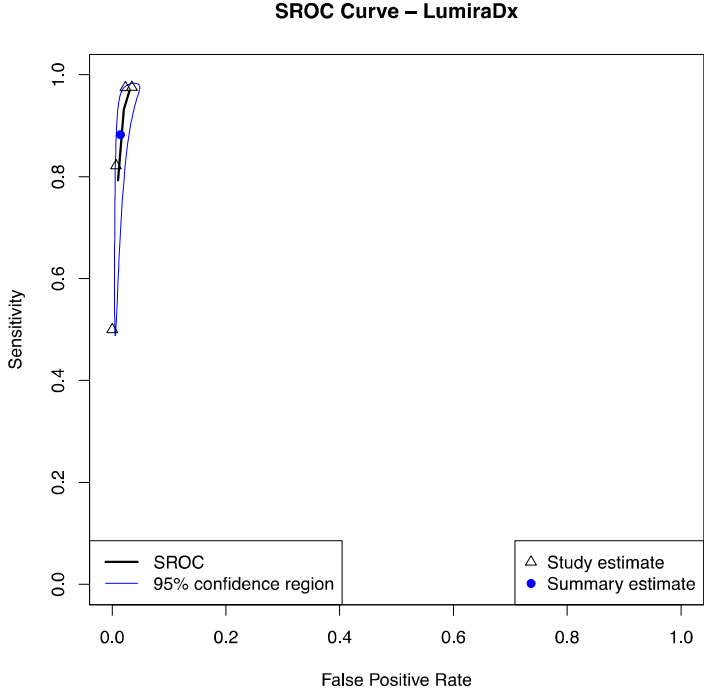

Supplement: pmed.1003735.s002.pdf [file pmed.1003735.s002.pdf]
