# Supplementary material for: Accuracy of novel antigen rapid diagnostics for SARS-CoV-2: A living systematic review and meta-analysis
Source: PubMed Central journal article supplement (PMC8389849; doi:10.1371/journal.pmed.1003735), 2021-08-12

## S5 Fig. Forest plots for subgroup analysis by CT-values per test.

Caption: CI = confidence interval

Fig A - Forest plot for CT values lower 20

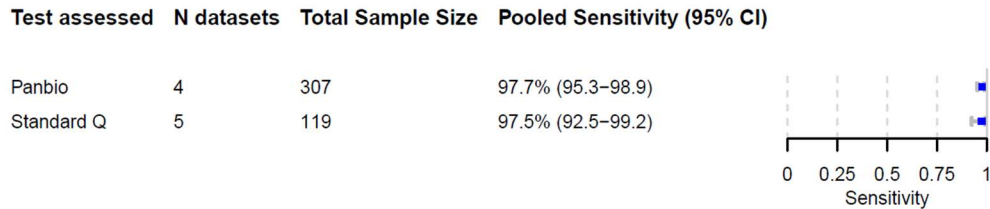

Fig B - Forest plot for CT values greater 25

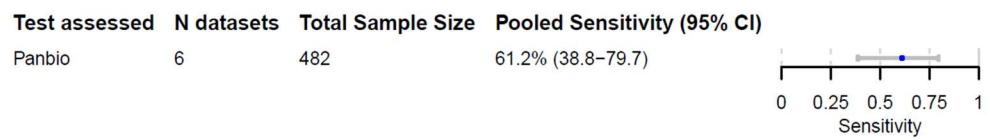

Fig C - Forest plot for CT values lower 25

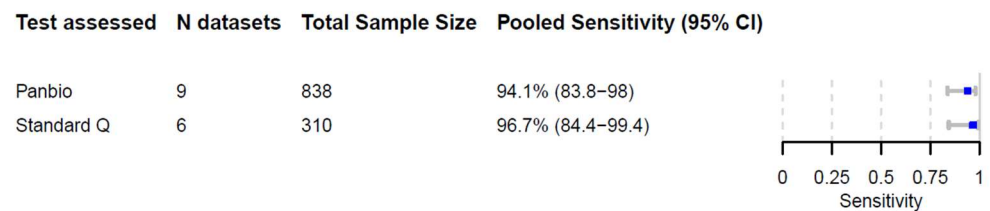

Fig D - forest plot for CT values greater 30

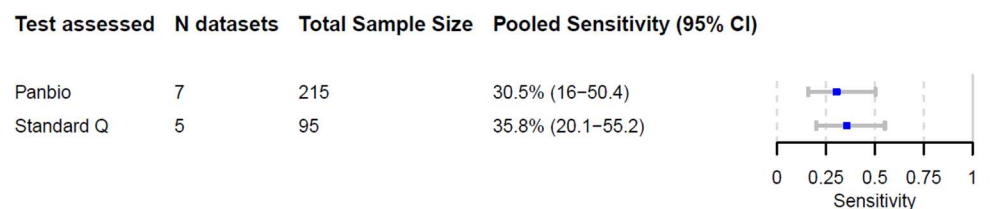

Fig E - forest plot for CT value lower 30

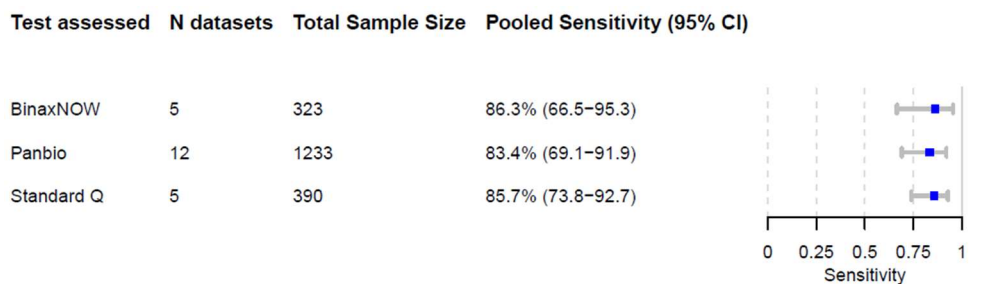

Supplement: pmed.1003735.s005.pdf [file pmed.1003735.s005.pdf]
