# Supplementary material for: Accuracy of novel antigen rapid diagnostics for SARS-CoV-2: A living systematic review and meta-analysis
Source: PubMed Central journal article supplement (PMC8389849; doi:10.1371/journal.pmed.1003735), 2021-08-12

## S8 Fig. Forest plots for subgroup analysis by symptomatic vs. asymptomatic.

Caption: CI = confidence interval

Figure A - Forest plot of asymptomatic patients

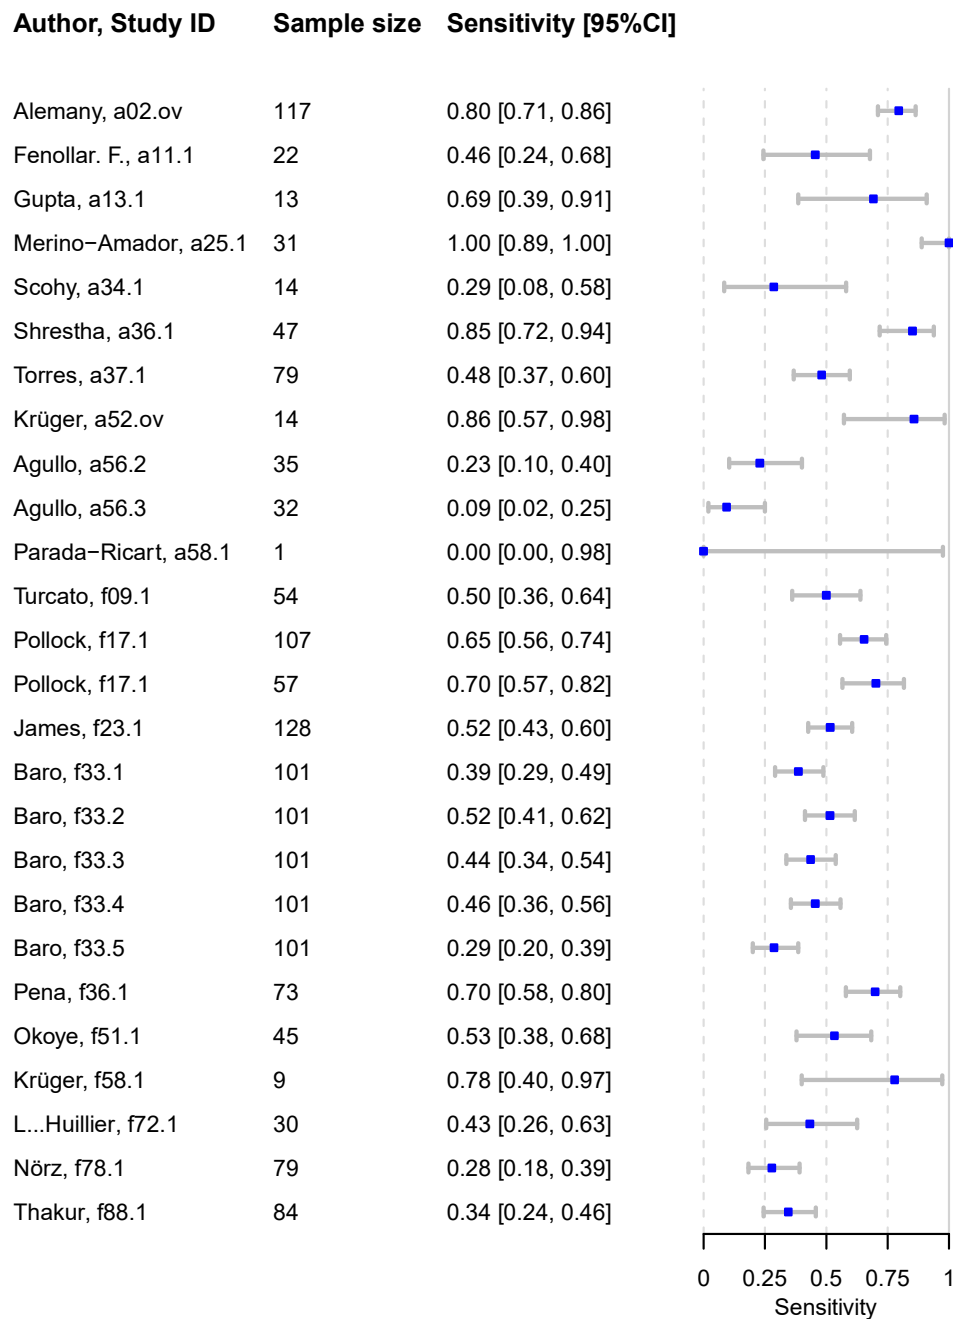

Figure B - Forest plot of symptomatic patients

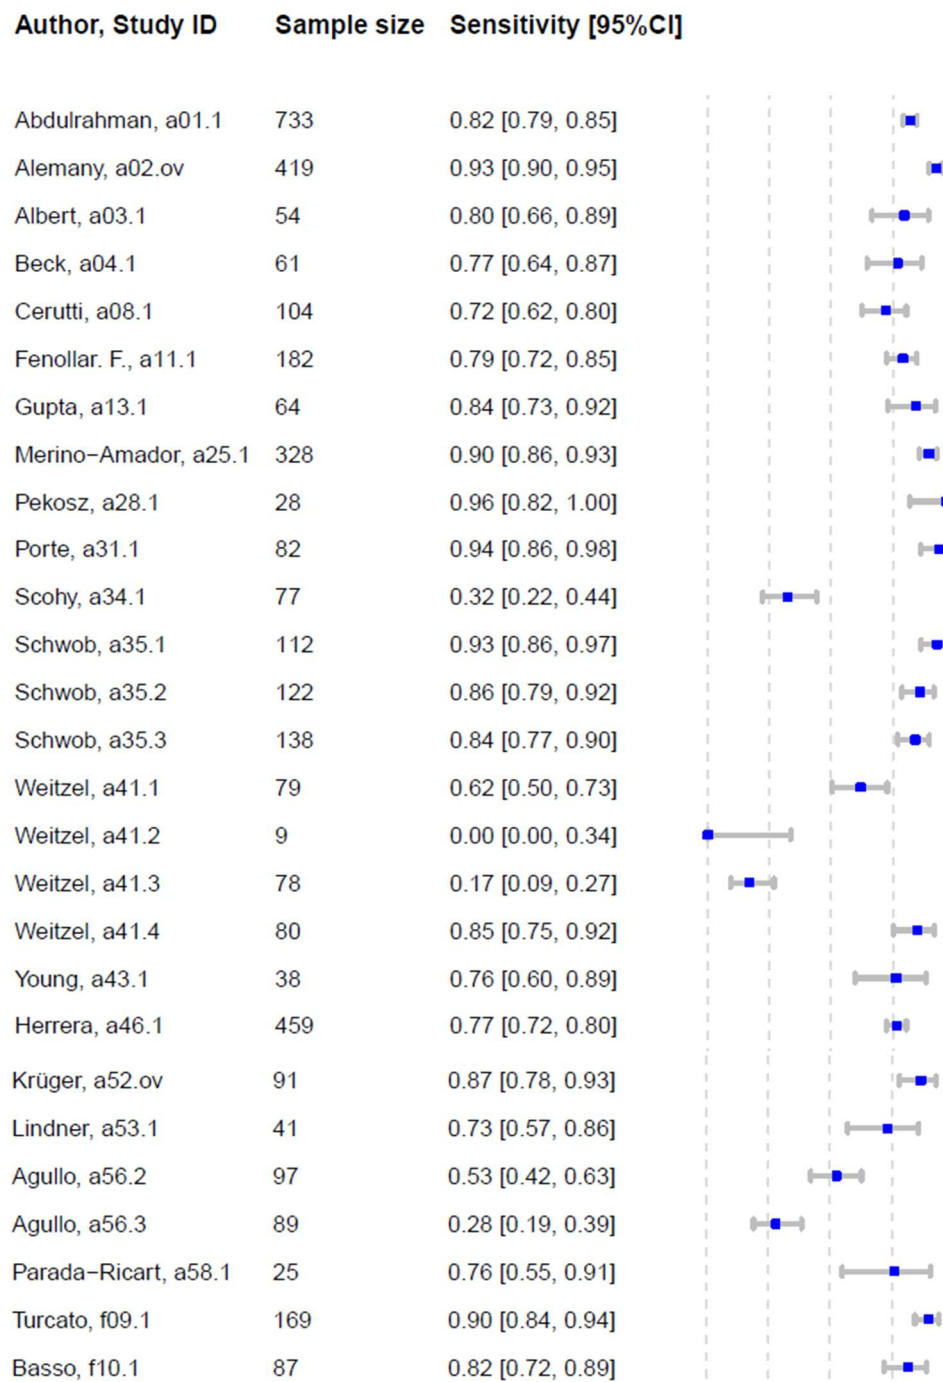

|                     |     |                   |
|---------------------|-----|-------------------|
| Takeuchi, f12.1     | 72  | 0.92 [0.83, 0.97] |
| Lindner, f15.1      | 40  | 0.85 [0.70, 0.94] |
| Lindner, f15.2      | 40  | 0.82 [0.67, 0.93] |
| Pollock, f17.1      | 128 | 0.91 [0.84, 0.95] |
| Möckel, f19.1       | 89  | 0.75 [0.65, 0.84] |
| Möckel, f19.2       | 25  | 0.72 [0.51, 0.88] |
| James, f23.1        | 24  | 0.83 [0.63, 0.95] |
| Nikolai, f35.1      | 36  | 0.86 [0.70, 0.95] |
| Nikolai, f35.2      | 36  | 0.86 [0.70, 0.95] |
| Nikolai, f35.3      | 34  | 0.91 [0.76, 0.98] |
| Nikolai, f35.4      | 34  | 0.91 [0.76, 0.98] |
| Lindner, a53.2      | 41  | 0.80 [0.65, 0.91] |
| Ristic, f44.1       | 43  | 0.58 [0.42, 0.73] |
| Villaverde, f55.1   | 77  | 0.46 [0.34, 0.57] |
| Krüger, f58.1       | 53  | 0.85 [0.72, 0.93] |
| Shidlovskaya, f61.1 | 78  | 0.56 [0.45, 0.68] |
| Shidlovskaya, f61.2 | 78  | 0.53 [0.41, 0.64] |
| Bouassa, f67.1      | 100 | 0.90 [0.82, 0.95] |
| L...Huillier, f72.1 | 89  | 0.73 [0.63, 0.82] |
| Nörz, f78.1         | 313 | 0.68 [0.63, 0.74] |
| Osmanodja, f79.1    | 70  | 0.89 [0.79, 0.95] |
| Thell, f81.1        | 213 | 0.80 [0.74, 0.85] |

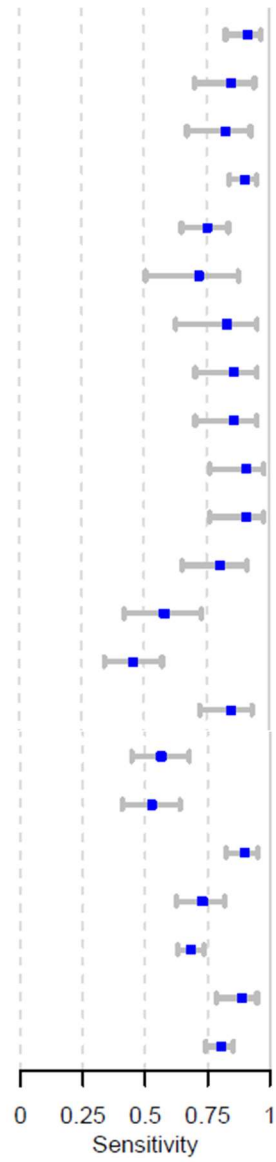

Supplement: pmed.1003735.s008.pdf [file pmed.1003735.s008.pdf]
