# Supplementary material for: Accuracy of novel antigen rapid diagnostics for SARS-CoV-2: A living systematic review and meta-analysis
Source: PubMed Central journal article supplement (PMC8389849; doi:10.1371/journal.pmed.1003735), 2021-08-12

## S9 Fig. Forest plots for subgroup analysis by symptom duration.

Caption: CI = confidence interval

Figure A - Forest plot of patients with symptom onset greater than seven days

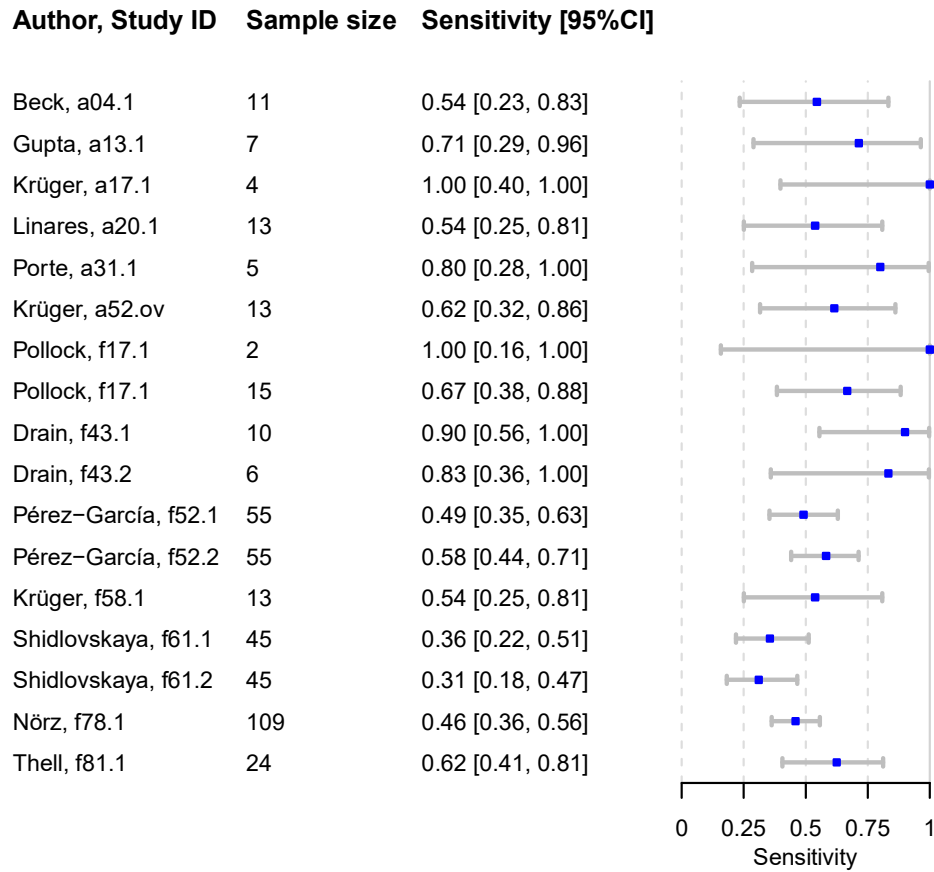

Figure B - Forest plot of patients with symptom onset less than seven days

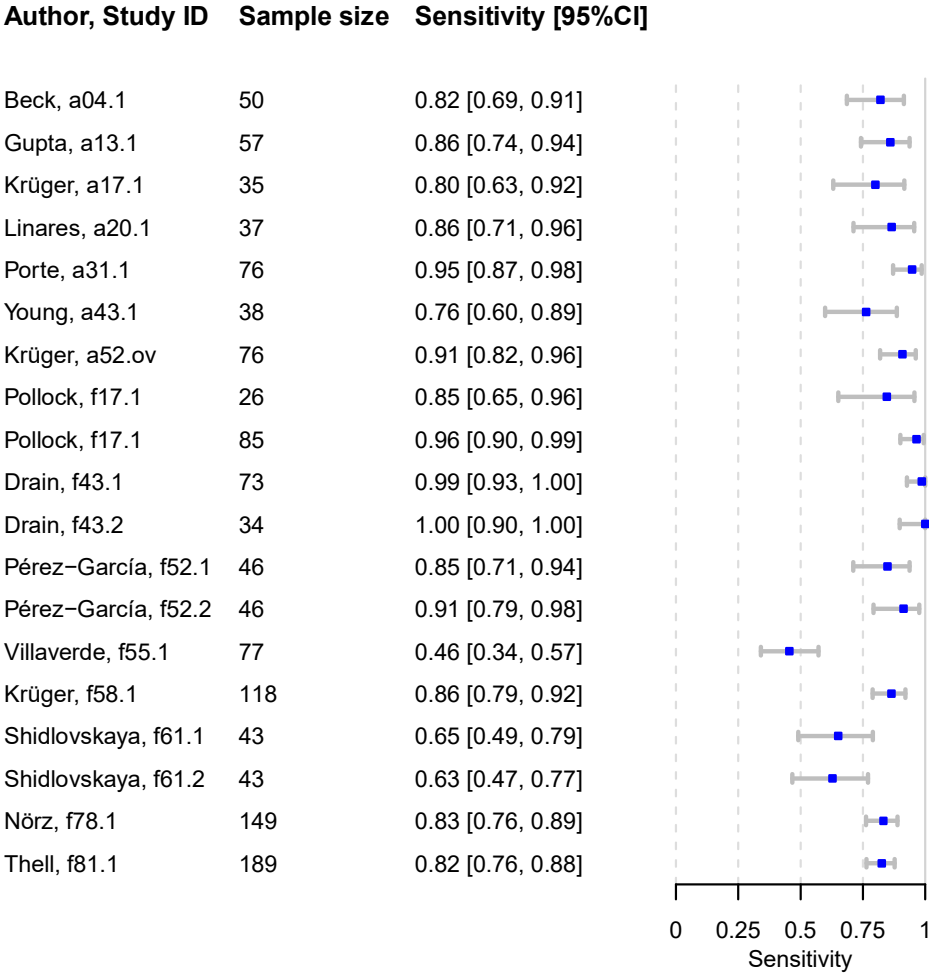

Supplement: pmed.1003735.s009.pdf [file pmed.1003735.s009.pdf]
