# Supplementary material for: Accuracy of novel antigen rapid diagnostics for SARS-CoV-2: A living systematic review and meta-analysis
Source: PubMed Central journal article supplement (PMC8389849; doi:10.1371/journal.pmed.1003735), 2021-08-12

S10 Fig. Funnel plot test for all data sets included in the meta-analysis.

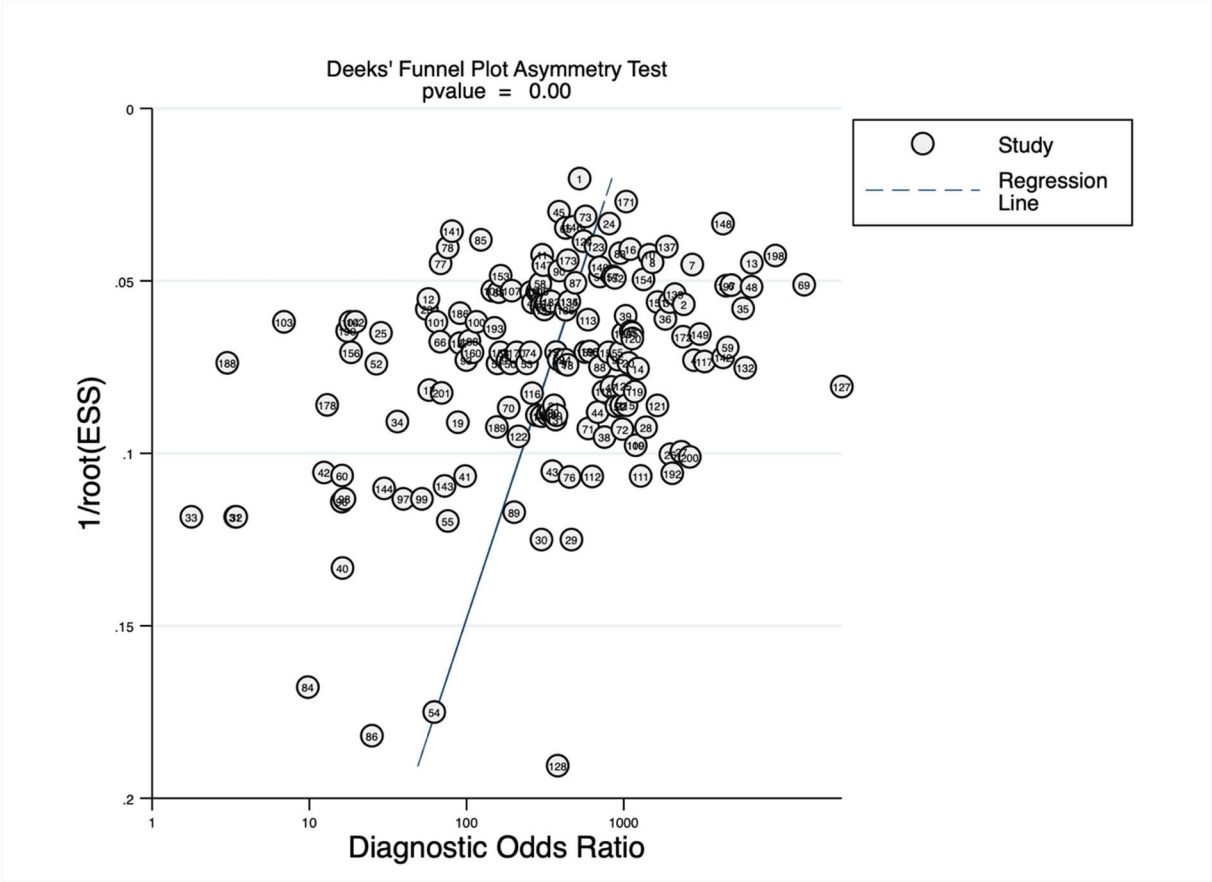

Supplement: pmed.1003735.s010.pdf [file pmed.1003735.s010.pdf]
